1 **Development of Inflammatory Bowel Disease is Linked to a Longitudinal Restructuring of the**  
2 **Gut Metagenome in Mice.**

3 Thomas Sharpton<sup>1,2\*</sup>, Svetlana Lyalina<sup>3\*</sup>, Julie Luong<sup>3</sup>, Joey Pham<sup>3</sup>, Emily M. Deal<sup>3</sup>, Courtney Armour<sup>1</sup>,  
4 Christopher Gaulke<sup>1</sup>, Shomyseh Sanjabi<sup>3,4</sup>, Katherine S. Pollard<sup>3,5#</sup>

5 <sup>1</sup> Department of Microbiology, Oregon State University, Corvallis, OR, USA

6 <sup>2</sup> Department of Statistics, Oregon State University, Corvallis, OR, USA

7 <sup>3</sup> Gladstone Institutes, San Francisco, CA, USA

8 <sup>4</sup> Department of Microbiology & Immunology, University of California, San Francisco, CA, USA

9 <sup>5</sup> Department of Epidemiology & Biostatistics, Institute for Human Genetics, and Institute for  
10 Computational Health Sciences, University of California, San Francisco, CA, USA

11 \* These authors contributed equally to this work

12 # Corresponding author

13 E-mail: [kpollard@gladstone.ucsf.edu](mailto:kpollard@gladstone.ucsf.edu)

14 Running title: Longitudinal Mouse IBD Microbiome

## 15 **Abstract**

16 The gut microbiome is linked to inflammatory bowel disease (IBD) severity and altered in late stage  
17 disease. However, it is unclear how gut microbial communities change over the course of IBD  
18 development, especially in regards to function. To investigate microbiome mediated disease  
19 mechanisms and discover early biomarkers of IBD, we conducted a longitudinal metagenomic  
20 investigation in an established mouse model of IBD, where dampened TGF- $\beta$  signaling in T cells leads  
21 to peripheral immune activation, weight loss, and severe colitis. IBD development is associated with  
22 abnormal gut microbiome temporal dynamics, including dampened acquisition of functional diversity  
23 and significant differences in abundance trajectories for KEGG modules such as glycosaminoglycan  
24 degradation, cellular chemotaxis, and type III and IV secretion systems. Most differences between sick  
25 and control mice emerge when mice begin to lose weight and heightened T cell activation is detected in  
26 peripheral blood. However, lipooligosaccharide transporter abundance diverges prior to immune  
27 activation, indicating that it could be a pre-disease indicator or microbiome-mediated disease  
28 mechanism. Taxonomic structure of the gut microbiome also significantly changes in association with  
29 IBD development, and the abundance of particular taxa, including several species of *Bacteroides*,  
30 correlate with immune activation. These discoveries were enabled by our use of generalized linear  
31 mixed effects models to test for differences in longitudinal profiles between healthy and diseased mice  
32 while accounting for the distributions of taxon and gene counts in metagenomic data. These findings  
33 demonstrate that longitudinal metagenomics is useful for discovering potential mechanisms through  
34 which the gut microbiome becomes altered in IBD.

## 36 **Importance**

38 IBD patients harbor distinct microbial communities with different functional capabilities compared to  
39 healthy people. But is this cause or effect? Answering this question requires data on changes in gut  
40 microbial communities leading up to disease onset. By performing weekly metagenomic sequencing  
41 and mixed effects modeling on an established mouse model of IBD, we identified several functional  
42 pathways encoded by the gut microbiome that covary with host immune status. These pathways are  
43 novel early biomarkers that may either enable microbes to live inside an inflamed gut or contribute to  
44 immune activation in IBD mice. Future work will validate the potential roles of these microbial pathways  
45 in host-microbe interactions and human disease. This study is novel in its longitudinal design and focus  
46 on microbial pathways, which provided new mechanistic insights into the role of gut microbes in IBD  
47 development.

49  
50 **Keywords:** gut microbiome, metagenome, inflammatory bowel disease, mouse model, TGF-beta ( $\beta$ ),  
51 autoimmunity, longitudinal modeling, biomarkers, T cell activation  
52  
53

## 54 **Background**

55

56 Inflammatory bowel disease (IBD) is an increasingly prevalent chronic autoimmune disease wherein the  
57 cells of the immune system attack intestinal tissue (1-3). Quality of life deteriorates, and patients die in  
58 severe cases. Unfortunately, the etiology of disease remains unclear and is likely complex (4).  
59 Discovery of the factors that contribute to IBD onset, development, and severity is needed to ensure  
60 accurate and effective health care. Epidemiological studies and animal model experiments have  
61 identified genetic (5-7) and lifestyle factors that associate with IBD, including diet (8) and exercise (9).  
62 But these factors are not precise predictors of disease risk, severity, or response to treatment, and  
63 many questions remain regarding disease mechanisms. Elucidating the cryptic etiology of IBD would  
64 enable new preventative measures, diagnostics, and therapies.

65

66 Recent work has implicated the gut microbiome in the development and severity of IBD (10). Individuals  
67 afflicted with Crohn's disease or ulcerative colitis, the two principal clinical forms of IBD, harbor distinct  
68 taxa relative to healthy controls (11-14). Shotgun metagenomics further revealed that the abundance of  
69 several microbial metabolic pathways are significantly altered in IBD guts (13, 15, 16). These  
70 associations may be causal, because gut microbes can influence the immune system and intestinal  
71 homeostasis. For example, immunosuppressive regulatory T cells (Tregs) are prevalent in the colonic  
72 lamina propria (LP) compared to other organs. But, their numbers are reduced in germ-free or  
73 antibiotic-treated mice, suggesting that microbiota affect colonic differentiation of peripheral Tregs  
74 (pTregs) (17, 18). A similar loss of Tregs occurs in people with polymorphisms in IBD-susceptibility  
75 genes that promote defects in Treg responses (19). Thus, gut microbes have the potential to interact  
76 with immune cells and this interaction can be altered due to host genetics and other risk factors in the  
77 development of IBD.

78

79 We hypothesized that the changes in immune status of individuals with IBD are associated with  
80 temporal alterations in the functional capabilities of their gut microbiota. Understanding how the gut

81 microbiome dynamically changes during IBD and how these changes relate to host symptoms and  
82 immune activation could clarify which microbiomic alterations contribute to disease onset and  
83 progression and which alterations respond to disease. We are particularly interested in elucidating  
84 specific microbial pathways that may induce or exacerbate immune activation and distinguishing these  
85 from pathways required for survival in an inflamed intestinal environment. Addressing these questions  
86 requires a prospective, longitudinal study of the microbiome in IBD.

87

88 Longitudinal investigations of the microbiome have tended to focus on taxonomic rather than functional  
89 changes (20, 21). One study used 16S sequencing in the T-bet<sup>-/-</sup> RAG2<sup>-/-</sup> Ulcerative Colitis (TRUC)  
90 mouse model of inflammatory disease to identify how gut microbiome taxonomic composition changes  
91 over the course of treatment-induced remission and then imputed how microbial pathway abundances  
92 might change over time with ancestral state reconstruction techniques (22). Shotgun metagenomic  
93 sequencing provides direct insight into the functions encoded in the microbiome, but it has not been  
94 applied to a longitudinal investigation of IBD. As a result, our insight into how the gut microbiome  
95 operates dynamically in association with disease development is limited.

96

97 Mouse models of disease present an opportunity to quantify the longitudinal covariation between gut  
98 microbiome functions and IBD development while overcoming the challenges associated with a  
99 prospective human study and reducing the extensive genetic, lifestyle, and microbiome variation among  
100 humans. We implemented this approach using a well-documented IBD model (23-29), where TGF- $\beta$   
101 dominant negative receptor II is driven by the CD4 promoter (CD4-dnT $\beta$ RII) (30), called DNR hereafter.  
102 TGF- $\beta$  is important for inducing pTreg differentiation (31), and its signaling in naive T cells results in  
103 activation and nuclear translocation of Smad2/3 molecules and regulation of target genes, including  
104 Foxp3 (32-34). Foxp3 then provides a positive feedback loop by downregulating Smad7, thereby  
105 reducing its inhibition of TGF- $\beta$  signaling (35). Absence of TGF- $\beta$  signaling in T cells results in loss of  
106 Foxp3 expression and defective *in vivo* expansion and immunosuppressive capacity of pTregs (36, 37).  
107 However, excess inflammation can also potently inhibit Foxp3 induction by TGF- $\beta$  (38, 39), and the

108 presence of certain inflammatory cytokines can instead divert differentiation of Tregs into pathogenic  
109 Th17 cells (40-45). Thus, due to TGF- $\beta$ 's involvement in Treg cell differentiation, and the requirement  
110 for Treg produced IL-10 to maintain intestinal homeostasis, TGF- $\beta$  signaling in T cells is an important  
111 component of intestinal immunity (46-54). Furthermore, mutations in both TGF- $\beta$  and IL-10 signaling  
112 pathways have been implicated in human IBD (55-58). As a result of the blockage of TGF $\beta$  signaling on  
113 their T cells, and reduced number of pTregs, DNR animals develop spontaneous colonic inflammation  
114 and IBD that is akin to Crohn's disease (30, 59). In addition to these physiological similarities, the DNR  
115 line serves as an effective model of human IBD because (i) human IBD is associated with mutations in  
116 SMAD3 (5, 60-62), a direct downstream target of TGF $\beta$  RII required for Foxp3 induction in the gut (33),  
117 and (ii) DNR mice model the documented effect of Smad7 overexpression in human IBD (63-65).

118

119 To obtain insight into how the longitudinal dynamics of the microbiome associate with IBD onset and  
120 progression, we followed DNR and littermate wild-type (hereafter, WT) controls from weaning through  
121 severe disease. We used shotgun metagenomics to quantify how fecal microbiome structure and  
122 function change over the course of disease development in DNR mice and identified components of the  
123 microbiome that both associate with and predict immune status. We focus on longitudinal changes in  
124 biological pathways (i.e., groups of genes performing a coherent function), using estimated abundances  
125 of KEGG modules from DNR and WT metagenomes. Our work indicates that the microbiome may  
126 contain biomarkers of IBD development, clarifies mechanisms through which the microbiome may  
127 contribute to disease development, and reveals how gut microbes operate to succeed in an inflamed  
128 intestinal environment.

129

## 130 **Results**

131

132 Age-matched female WT and DNR littermates were monitored longitudinally for IBD development over  
133 a period of 9 weeks, starting at 4 weeks of age upon being weaned from their mother. As this is a T  
134 cell-mediated IBD model, we quantified peripheral CD4 and CD8 T cell activation by flow cytometry and

135 measured the longitudinal change in the CD44<sup>hi</sup> activated fraction, which includes both effector and  
136 memory T cells (Additional File 1: Figure S1). We also measured the weight of the animals over time  
137 (Fig. 1A). As expected, WT mice gained weight and maintained a constant fraction of activated T cells.  
138 DNR mice, conversely, stopped gaining weight and experienced a sharp increase in CD4 T cell  
139 activation followed by gradual increase in CD8 T cell activation starting at 7 weeks of age (Fig. 1).  
140 These results indicate that in our facility, the DNR mice develop signs of IBD starting around week 7  
141 and full disease by week 9. DNR mice had to be euthanized by week 15, as they had lost more than  
142 15% of their maximum body weight. Similar to the T cell activation phenotype observed in the blood  
143 after week 7 (Fig. 1B-C), the DNR animals had a larger fraction of activated T cells in the spleen and  
144 the gut-draining mesenteric lymph node (MLN) at week 15 (Additional File 2: Figure S2).

145

146 We used shotgun metagenomics to assess how the functional potential of the gut microbiome  
147 diversifies over the course of disease progression. Specifically, we collected stool samples from parallel  
148 cohorts of DNR and WT mice weekly and performed shotgun metagenomic sequencing from samples  
149 obtained at 4, 5, 6, 8, 10, 12, and 13 weeks of age (Additional File 3: Table S1). We then quantified the  
150 abundance of KEGG modules encoded in each metagenome with ShotMAP (16), which revealed 373  
151 modules present in at least one sample. These module abundances were then used to quantify how the  
152 within-sample (alpha) diversity of microbiome functions varies over time in DNR and WT mice. A  
153 Kruskal-Wallis test of the change in KEGG module Shannon entropy over time (Additional File 4: Figure  
154 S3) found that the DNR mice are relatively stable in their functional alpha-diversity ( $p=0.47$ ) as  
155 compared to WT mice ( $p=0.078$ ). We also observed that functional alpha-diversity varies among  
156 individuals within a line over time, and that this variation differs between lines in association with  
157 disease activation (week 7). Specifically, the coefficient of variation of KEGG module Shannon entropy  
158 (CV) from a generalized linear model is higher among WT than DNR mice after disease activation ( $p =$   
159  $0.0085$ ). We also find that the CV is higher among DNR mice prior to activation, though this difference  
160 is reduced when the disproportionately variable week 5 samples are removed from the analysis

161 (p=0.21). These results show that the functional diversity of the mouse gut microbiome is relatively  
162 constrained early in life but increases over the lifetimes of WT but not DNR individuals.

163

164 We then investigated how the composition of gut microbiome functions varies over time and between  
165 cohorts (DNR vs. WT) by using an abundance-weighted beta-diversity metric (Bray-Curtis dissimilarity).

166 At a global level, KEGG module abundances were similar between DNR and WT mice prior to week 6,  
167 but then diverged over time as IBD developed in the DNR mice (Fig. 2). Furthermore, the diversity of  
168 KEGG modules found in a metagenome was significantly associated with the week that the sample was  
169 collected within the cohort (PERMANOVA p=0.01, R<sup>2</sup>=0.42), as well as cohort's weekly mean activated  
170 T cell status (pcCD4tCD44hi, PERMANOVA p=0.001, R<sup>2</sup>=0.16). Thus, there exist microbiome-encoded  
171 functional modules that differ in abundance in association with IBD progression in DNR mice.

172

173 This temporal divergence in DNR versus WT microbiome functions is mirrored in the taxonomic  
174 structure of the microbiome (Fig. 2). The composition of the gut metagenomes is relatively similar  
175 between WT and DNR lines at early time points and begins to diverge at week 6. Additionally, the  
176 microbiomes of WT mice remain relatively consistent over time as compared to DNR mice, though they  
177 are not without temporal variation. Indeed, similar to the functional diversity analysis, the taxonomic  
178 beta-diversity of the microbiome significantly differs between the lines over time (PERMANOVA  
179 p=0.004, R<sup>2</sup>=0.46), though not with mean activated T cell status (PERMANOVA p=0.118, R<sup>2</sup>=0.046).  
180 Collectively, these analyses indicate that (1) the diversity and structure of the gut microbiome varies  
181 over time between 4 and 15 weeks of age in both WT and DNR mice, (2) WT and DNR microbiomes  
182 are generally consistent prior to immune activation in DNR mice, but diverge afterwards, and (3)  
183 immune activation is associated with changes in the subsequent succession of the gut microbiome.

184

185 Based on these observations, we assessed how specific components of the microbiome associate with  
186 disease development. A key novelty of our approach is the use of Tweedie compound Poisson  
187 generalized linear mixed effects models (GLMMs). These models allow us to test for differences in

188 temporal trends in KEGG module abundance between DNR and WT mice while accounting for baseline  
189 differences between mice and genotypes, as well as DNA extraction kit effects. GLMMs enable  
190 accurate modeling of non-normally distributed abundance data and correctly account for multiple  
191 sources of variation (66), including the inter-subject variation that is present in repeated measures  
192 designs such as the longitudinal sampling of individual mice in our study. The Tweedie compound  
193 Poisson distribution, which is a weighted mixture between Poisson and Gamma distributions, has a  
194 number of other attractive features. Its exponential relationship between variance and mean captures  
195 the overdispersion that is frequently present in environmental DNA sequence data, and its point mass  
196 at zero allows for one-step fitting of zero-inflated data (versus fitting a model to determine feature  
197 presence/absence before modeling non-zero components, as in hurdle models). Additionally, the  
198 Tweedie compound Poisson is a continuous distribution, allowing us to use a normalized abundance  
199 measure as the dependent variable, instead of raw counts. We provide a more detailed description of  
200 the models used in our analysis in [Additional Data File 5: Text S1](#).

201

202 We first looked at overall trends of abundance trajectories for DNR versus WT mice as quantified by the  
203 interaction between genotype and time in the GLMM. These analyses revealed 29 KEGG modules with  
204 significant differences in abundance trends between DNR and WT mice ( $FDR < 0.05$ ). The interaction  
205 coefficient was positive for 26 of the significant modules ([Additional File 6: Table S2](#)), which indicates  
206 that these modules became increasingly abundant in DNR versus WT mice over time. This set includes  
207 modules associated with uridine monophosphate biosynthesis (M00051), keratin sulfate degradation  
208 (M00079), and the type III secretion system (M00332). The three modules with negative interaction  
209 coefficients, indicating decreasing abundance in DNR versus WT mice over time ([Fig. 3](#)), are lysine  
210 biosynthesis (M00031), lipooligosaccharide transport (M00252), and melatonin biosynthesis (M00037).

211

212 To obtain improved temporal resolution regarding the divergence of module abundance in DNR mice,  
213 we extended our GLMMs to include a “hinge” at week 7, which is when immune activation initiates in  
214 DNR mice. This segmented regression approach has the potential to discover modules that diverge in



215 abundance between DNR and WT mice either between weeks 4 and 7 or between weeks 7 and 13.  
216 Only 13 of the 29 previously identified modules exhibited a significant effect when using segmented  
217 regression (Fig. 4), likely due to a loss of power from partitioning the data into two smaller sets of  
218 samples. However for these 13 modules, our results clarify when DNR and WT abundances began to  
219 diverge (Additional File 7: Table S3). The predominant pattern was similar module abundance prior to  
220 week 7, followed by divergence after immune activation (11/13 modules). This pattern suggests that  
221 these modules respond to disease or play a role in disease progression.

222

223 Lipooligosaccharide transport (M00252), which is a two-component system with an unknown substrate  
224 in the mammalian gut, was the only module that stratified DNR and WT mice both before and after  
225 disease onset. To further investigate the potential taxa that may drive this particular signal, we  
226 assessed the taxonomic source of the KEGG sequences that recruited metagenomic reads into the  
227 module. We also quantified the distance covariance (67) between the longitudinal trajectories of the  
228 KEGG Orthology Groups (KOs) that comprise the module and each observed species' trajectory. The  
229 result was mixed, with the former analysis suggesting primarily *Streptococcus* contributions, while the  
230 latter identified greatest similarity with *Lactobacillus murinus* and *Candidatus* Arthromitus trajectories  
231 (Additional File 8: Figure S4). The differences in the taxonomic composition of the reference data  
232 underlying these two approaches could account for these inconsistencies, as could the fact that the  
233 KEGG analysis relies on amino acid comparisons while the species trajectories are determined through  
234 nucleotide comparisons. Thus, an uncharacterized lipooligosaccharide transporter encoded in  
235 *Streptococcus* and other gut microbes decreases in abundance over time at a significantly faster rate in  
236 DNR compared to WT mice, starting early in life before weight loss and immune activation.

237

238 Type III secretion system (M00332) differed in its temporal change between the lines uniquely before  
239 disease onset. Specifically, the module decreased in abundance in WT mice over weeks 1-7, with KO  
240 K03225 primarily driving this effect. On the other hand, this module was relatively stable in DNR mice  
241 prior to disease onset, and several of the KOs that comprise the module increased in DNR mice in the

242 later weeks (Fig. 4). The discovery of stable, rather than decreasing, abundance of K03225 as an early  
243 indicator of IBD in DNR mice is intriguing because Type III secretion systems are used by pathogens to  
244 invade the gut community and alter the gut environment (68, 69).

245

246 We next examined baseline differences in module abundance between DNR and WT mice at weaning.  
247 Early differences could result from genotype-specific selection of the gut microbiome or cage effects.  
248 Our models revealed 17 modules with significantly different intercepts ( $q < 0.05$ ), which indicates  
249 differences in abundance between the two lines at week 4 (Additional File 9: Table S4). Eight of these  
250 modules, including several methanogenesis associated pathways, had positive intercept coefficients,  
251 meaning that they were more abundant in DNR compared to WT mice at week 4. Lipopolysaccharide  
252 biosynthesis and eight other modules showed the opposite effect and were higher in WT mice at  
253 weaning. This early-life variation in the microbiome supports hypotheses that pre-adolescent  
254 development of the microbiome can affect health state later in life. However, these temporal  
255 relationships are complex: later changes in abundance, as captured by the time by cohort interaction,  
256 could reverse the pattern seen at weaning.

257

258 To explore temporal dynamics of specific gut taxa, we applied the same GLMM analysis to species  
259 abundances. This analysis yielded no significant results at  $FDR < 0.05$ , likely due to not having the  
260 advantage of grouping components across a higher order variable. While species could be grouped into  
261 higher taxonomic entities, the model assumption that members of the same group tend to covary  
262 across samples and over time may be violated because members of the same taxonomy may compete  
263 or ecologically exclude one another (70). We evaluated this possibility by applying a non-parametric  
264 decomposition of variance components (71) to assess whether within-module or within-genus  
265 dispersion decomposition patterns were significantly different from those obtained from random  
266 permutations of the underlying data. This auxiliary analysis finds that components of functional groups  
267 covary more than random while components of taxonomic groups do not (Additional Data File 10:  
268 Figure S5). This observation indicates that grouping taxa would violate GLMM model assumptions.

269 Consequently, we instead used a goodness-of-fit test based on functional principal components  
270 analysis (FPCA), which is less rigid in its assumption of linearity and capable of borrowing information  
271 across species due to the representation of abundance trajectories as combinations of eigen-functions  
272 derived from the entire dataset. This test identified seven species that significantly differ in their  
273 variation over time between the DNR and WT cohorts (Figure 5; Table 1), including greater increases in  
274 abundance over time within DNR microbiomes for *E. coli* and four species from the *Bacteroides* genus,  
275 which are associated with gut inflammation (10).

276

## 277 Discussion

278

279 This study represents the first shotgun metagenomic characterization of IBD development. By using a  
280 controlled mouse model, a longitudinal study design, and statistical modeling, we identified novel  
281 microbial biomarkers associated with IBD onset and progression. Many of the taxa and functions we  
282 implicated have known roles in immune regulation and pathogenicity, making them plausible  
283 candidates for stimulating the disease process, while others likely represent responses of the  
284 microbiota to changes in host physiology. Ordination and GLMM analyses enabled us to distinguish  
285 these scenarios by identifying significant differences between DNR and WT mice over time from  
286 weaning through severe disease. We discovered that lipooligosaccharide transport and type III  
287 secretion protein abundance trajectories between weaning and immune activation differentiate DNR  
288 mice prior to immune activation, making them promising early biomarkers and consistent with a  
289 potentially causal role in IBD. Abundances of 17 modules are altered in DNR mice at weaning and  
290 could predict IBD risk if they generalize to other mouse models and human disease (see below). Many  
291 other modules as well as a few species have altered abundances in DNR mice in later, more severe  
292 stages of disease. Functional and taxonomic diversity also show temporal differences in DNR mice that  
293 correlate with immune profiles and/or disease progression. Most of these discoveries would have been  
294 missed in a cross-sectional study because the disease association is a longitudinal trend.

295

296 By using shotgun metagenomics, we were able to investigate both taxonomic and functional  
297 characteristics of the IBD microbiome. Both types of data consistently showed differences between  
298 DNR and WT mice. For example, beta-diversity analyses revealed increasing divergence of both  
299 taxonomic and functional profiles between DNR and WT microbiomes over the last four weeks of the  
300 study. In addition, the individual taxa and modules with genotype-specific trajectories predominantly  
301 had increased abundance in DNR mice after disease onset. These similarities in the successional  
302 diversification of species and genes support the idea that taxonomic changes in IBD have functional  
303 consequences that are linked to immune activation. Despite such parallels, our taxonomic and  
304 functional results differed in several important ways. Notably, a smaller number of species stratify lines  
305 over time as compared to KEGG modules. Furthermore, most of the IBD-associated modules we  
306 discovered were not represented solely in singular species and would have been missed by  
307 considering information from taxonomic analyses only. These results could be due to disease-  
308 associated functional redundancy, wherein a gene that is enriched in DNRs might derive from different  
309 species in each mouse. Other potential reasons include (1) higher power due to grouping protein  
310 families into modules, and (2) missed taxonomic associations due to the relatively small number of  
311 laboratory mouse associated microbes in the genome tree of life (72). Future work should explore how  
312 taxa missed by reference-based quantification vary in association with IBD in DNR mice.

313

314 Despite finding relatively few species that distinguish DNR mice, we can gain insight into the disease  
315 process from what is known about how these taxa interact with the host. It is striking that four of the  
316 seven species that change in abundance as IBD develops belong to the genus *Bacteroides*, three of  
317 which are more abundant in DNR mice. Several studies have implicated *Bacteroides* in intestinal  
318 inflammation. For example, a subset of *B. fragilis* strains carry a proinflammatory metalloprotease toxin  
319 that has been identified in 19.3% of patients with active IBD (73), and the inoculation of animals with  
320 such strains is associated with severe colitis (10, 74). Subsequent research showed that multiple  
321 commensal species of *Bacteroides* could be incorporated into the gut microbiomes of IBD-susceptible  
322 genotypes of mice to induce IBD, including mice with TGF- $\beta$  susceptibility loci (75). Supporting the idea

323 that *Bacteroides* contribute to IBD, we observe a modest increase ( $q=0.1898$ ) in the  
324 hemophore/metalloprotease transport system module (M00328) in DNR mice as disease progresses.  
325 These and other mechanistic hypotheses must be tested, because the species of *Bacteroides* we  
326 identified are diverse and species within the same genus can exhibit discordant patterns of interaction  
327 with host physiology (76).

328

329 Cross-sectional and mechanistic investigations of IBD support our finding that disease development is  
330 linked to microbiome taxonomy and function (4, 77, 78). The progressive divergence of DNR and WT  
331 microbiomes as IBD worsens is consistent with a 16S-based study using a different mouse model of  
332 IBD in which gut microbes and imputed functions changed in association with disease status and  
333 therapeutically induced remission (22). Additionally, studies in germ-free mouse models of IBD  
334 implicate the gut microbiome in disease development. For example, interleukin (IL)-10-knockout mice  
335 grown under germ-free conditions do not develop colitis, while conventionally raised mice do (79).  
336 Similar findings have been reported for the TRUC mouse model (80). Furthermore, IL-10-knockout (81)  
337 and IL-2-deficient (82) mice manifest differential severity of colitis dependent on the types of taxa that  
338 colonize their gut. Human studies of IBD have yet to investigate the disease longitudinally. However,  
339 our results are consistent with microbiome case-control studies that found significant differences in the  
340 taxonomic (11, 83-87) and functional (13, 16, 22) profiles of IBD patients compared to healthy controls,  
341 especially in Crohn's disease. Additionally, clinical administration of antibiotics shows promise for  
342 reducing the intestinal inflammation associated with IBD (88, 89). The longitudinal biomarkers we  
343 identified are promising new candidates to investigate in the context of human disease onset and  
344 progression.

345

346 Our analyses identified several modules that implicate a pathogenic effect by the DNR microbiome. For  
347 example, DNR mouse microbiomes increase in the abundance of adhesion protein transport modules  
348 (M00330) in association with disease, which may help pathobiotic members of the microbiome  
349 associate with and metabolize intestinal mucosa (90). Correspondingly, keratan (M00079) and

350 dermatan (M00076) sulfate degradation pathways increase in abundance as disease progresses.  
351 Keratan sulfate and dermatan sulfate are glycosaminoglycans (GAGs) that are integral to intestinal  
352 mucosa and regulate the permeability of the gut epithelium. These sulfated GAGs are depleted in IBD  
353 patients (91), and their metabolism by intestinal bacteria, including *Bacteroides thetaiotaomicron*,  
354 contributes to intestinal colonization (92, 93). Furthermore, Crohn's metagenomes exhibit an increase  
355 in GAG degradation pathways (94). DNR guts also have elevated levels of Type III and Type IV  
356 secretion systems, which pathogenic organisms leverage to successfully invade the gut microbiome  
357 and induce preferable ecological conditions within the gut (68, 69). Curiously, type III secretion  
358 abundance shows the opposite effect before immune activation (weeks 4-7), perhaps because of broad  
359 shifts in community composition after week 7 or alternatively due to microbes with type III secretion  
360 systems invading the LP and becoming less abundant in stool over time. Finally, we observe an  
361 increase in modules associated with the biosynthesis of isoprenoids, which have been linked to the  
362 stimulation of the mammalian immune system (95). Together these DNR-associated pathways support  
363 a pathogenic role of gut microbes in IBD development. Future studies that seek to determine the  
364 existence of a microbiome-mediated etiology for IBD should consider these potential mechanisms of  
365 disease activation.

366

367 Our identification of pathways that change in association with IBD development generates many novel  
368 hypotheses about the mechanisms through which gut microbes contribute or respond to disease  
369 development. Future studies can explicitly test these hypotheses to discern the cause and effect  
370 relationship between the gut microbiome and inflammatory bowel disease. Several KEGG modules with  
371 different abundance dynamics in DNR versus WT mice appear to be associated with the microbiome's  
372 acclimation to the disease environment. For example, we observe increases in two-component systems  
373 (M00511, M00482) that may contribute to a cell's ability to manage the elevated oxidative stress that  
374 exists during active IBD (96). We also observe increases in pathways associated with cellular  
375 chemotaxis (M00515, M00507). This result is consistent with observations of increased cell motility  
376 pathways in the gut microbiomes of TRUC mice suffering active colitis using imputation from 16S data

377 (22). This result also aligns with prior work that implicated toll-like receptor recognition of flagellar  
378 bacterial antigens in the development of intestinal inflammation (97, 98). Based on these observations,  
379 we speculate that chemotaxis pathways help microbiota scavenge the metabolic resources required to  
380 survive inside of an inflamed gut or invade the host given that intestinal permeability frequently  
381 increases during IBD flare-ups (99).

382

383 We also observe several biosynthetic modules that increase in association with IBD development. For  
384 example, modules related to the biosynthesis of uridine monophosphate, leucine, proline, and ammonia  
385 change in association with disease. These results may suggest that the metabolic preferences and  
386 needs of the organisms that comprise the microbiome change as disease develops. Alternatively, it  
387 may be that more T cells are entering the gut, becoming activated, and consequently consuming the  
388 local resources, which in turn results in bacteria activating biosynthetic pathways to survive and  
389 compete. Our finding that pathways associated with ammonia production (M00531) increase in DNR  
390 mice is noteworthy because prior studies have found that IBD associates with a lower pH in the  
391 intestinal lumen (100), and the production of ammonia by bacteria may serve to buffer such pH  
392 changes. Additionally, these pathways are utilized when bacteria metabolize proteins, amino acids, and  
393 urea, and the increase in this pathway may indicate a preferential utilization of these substrates by the  
394 microbiome or, as above, immune cells, during disease.

395

396 Furthermore, we observe increases in modules associated with choline metabolism, specifically betaine  
397 and phosphatidylcholine biosynthesis. Recent work has connected the gut microbiome's production of  
398 these metabolites to increased cardiovascular disease risk (101). Our finding is important because a  
399 growing number of studies indicate that IBD patients have an increased risk of developing  
400 cardiovascular disease, especially during flare-ups (102, 103). The mechanisms underlying this  
401 increased risk are not well resolved, but may relate to a proposed explanation for the increased  
402 cardiovascular disease risk observed in HIV-infected patients (104, 105). Under this model, changes in  
403 the relative proportion of protective to pathobiotic gut microbiota, especially those capable of

404 translocating across the gut epithelium, activate a chronic systemic inflammation that increases  
405 cardiovascular disease risk. It is thus tempting to speculate that, based on our observations in these  
406 mouse models of disease, IBD and perhaps HIV-associated changes in microbial metabolism of choline  
407 contribute to or at least indicate this increased risk of cardiovascular disease.

408

409 Another intriguing hypothesis emerges from our observation that heme transport genes are elevated in  
410 DNR mice as IBD develops. Bacteria use this module to scavenge iron from the environment. Iron is a  
411 crucial component for many cellular processes, but gut microbes seldom have access to free iron and  
412 instead sequester it from host sources, such as heme (106, 107). Heme concentrations may be  
413 increased in IBD, as a common feature of the disease is intestinal bleeding (108). Hence, we  
414 hypothesize that gut microbes that can take advantage of this heme may flourish in DNR mice. It is  
415 intriguing to further speculate that microbial sequestration of heme contributes to IBD (e.g., through  
416 signaling to the immune system) or to iron deficiency in IBD patients (109).

417

418 One surprising discovery was an increase in pathways associated with the production of benzoate  
419 (M00538) in DNR mice. Benzoate is a carboxylic acid produced by microbial degradation of dietary  
420 aromatic compounds and is a precursor of hippurate biosynthesis in mammals (110). Prior work  
421 suggested that hippurate may be a useful diagnostic of Crohn's disease given that it is found at  
422 significantly lower levels in the urine of patients (110) and that the gut microbiome's production of  
423 benzoate is responsible for these differences in urinary hippurate (111). Our results are inconsistent  
424 with this prior work in such that they indicate that intestinal benzoate biosynthesis is higher in sick  
425 animals. This difference may be due to variation in the host species being investigated, including how  
426 benzoate is subsequently metabolized in the gut or by the host. Alternatively, the potential of the DNR  
427 microbiome to make excess hippurate may not be realized given that we performed DNA sequencing.  
428 Future mechanistic studies could measure benzoate and hippurate and quantify the benzoate proteins  
429 at the RNA or protein level in DNR versus WT mice.

430



431 Most of the taxonomic and functional IBD biomarkers we identified are increasingly abundant in DNR  
432 mice throughout the disease process. But three modules show the opposite trajectory and decrease in  
433 abundance over time in DNR relative to WT mice: melatonin biosynthesis (M00037), lysine biosynthesis  
434 (M00031), and lipooligosaccharide transport (M00252). Melatonin has a dual effect on the immune  
435 system, acting in a stimulatory manner in early infection, and in an immunomodulatory manner in cases  
436 of prolonged inflammation (112). The effects of melatonin produced by gut commensals have not been  
437 studied as extensively as those of endogenous melatonin. Traditionally, melatonin acts as a potent  
438 antioxidant, although additional quorum signaling functions in bacteria have been recently reported  
439 (113). The reduction in melatonin biosynthesis capacity observed in the DNR mice could be caused by  
440 the expansion of species that can tolerate a highly oxidative environment (114) or microbes that utilize  
441 other strategies for neutralizing reactive oxygen species. Without metabolite data, it is not possible to  
442 definitively say that the final concentrations of melatonin are reduced in the disease state, since the  
443 decrease can be offset by host production. With respect to lysine biosynthesis, this module is also  
444 depleted in human IBD microbiomes (115), indicating that there may exist similar mechanisms of  
445 interaction between disease context and the gut microbiome across species. Future work should  
446 empirically test the potential role of these microbiome functions on the development of IBD, especially  
447 in individuals that are genetically susceptible for the disease.

448

449 Lipooligosaccharide transport is the only module to show significant differences in abundance  
450 trajectories both pre- and post-activation. Intriguingly, it is consistently lower in DNR versus WT mice  
451 throughout our study with the largest difference during weeks 4-7, prior to immune activation and  
452 disease symptoms. This finding initially seems surprising, because lipooligosaccharides are the major  
453 glycolipids that are produced by mucosal Gram-negative bacteria and are known to have  
454 proinflammatory effects (116). However, the two genes (NodI and NodJ) in the lipooligosaccharide  
455 transport system are present across diverse prokaryotes, and the substrates of this two-component  
456 ABC transporter are not characterized beyond lipo-chitin oligosaccharide export in rhizobial bacteria  
457 (117, 118). Determining what this system transports in the mammalian gut and how its function

458 changes in IBD is an exciting future direction. Regardless of mechanism, the consistent and pre-  
459 symptomatic depletion of lipooligosaccharide transport genes in DNR mice make this module a  
460 promising candidate biomarker for predicting and diagnosing IBD.

461

462 We relied on a mouse model to quantify the longitudinal interaction between the gut microbiome and  
463 disease because the extensive inter-individual variation in human genetics, lifestyle, microbiome  
464 composition, and disease status and severity can complicate study design, analysis, and interpretation.  
465 We used the DNR mouse model because it is relevant to our understanding of the mucosal  
466 immunological dysregulation that occurs during human IBD and, consequently, its interaction with the  
467 gut microbiome. Indeed, we observe immune activation in the blood of the DNR mice that is consistent  
468 with what has been observed in human IBD (119). The phenotype observed in DNR mice is akin to  
469 severe Crohn's disease with relatively substantial immunological activation and weight loss by week 12.  
470 Interpretations of the microbiome-disease interaction in this model should be considerate of this  
471 relatively severe disease status. Alternative mouse lines may be better models for other forms of IBD.  
472 Another consideration is that we found some baseline differences in microbiome protein abundances in  
473 DNR mice at weaning that may be specific to this genetic model of IBD. Ultimately, comparisons  
474 between our results and those obtained by the integrated Human Microbiome Project (iHMP) (120)  
475 which is longitudinally evaluating the microbiome and immune status of IBD patients, will clarify the  
476 relevance of the findings produced by the DNR model to human populations. Additionally, future  
477 research should use this model and build upon our findings to clarify how TGF- $\beta$  induced differentiation  
478 and function of T cells interacts with the taxonomic structure and function of the gut microbiome.

479

480 Overall, our results indicate that the development of IBD is associated with corresponding  
481 changes in the operation of the gut microbiome. Microbial taxa and KEGG module abundances vary  
482 over time and in association with immune activation. Furthermore, our results suggest that the gut  
483 microbiome may contribute to disease by activating inflammation through metabolism of mucosa and  
484 by expressing proinflammatory and downregulating anti-inflammatory metabolites. Because our study

485 relied on the imputation of microbiome function from DNA sequences, we cannot definitively conclude  
486 that the observed differences in the microbiome's functional profiles manifest as differences in the  
487 metabolites produced by the microbiome. Future research that applies direct measurements of  
488 microbiome function should be used to validate and expand the results presented here. Regardless,  
489 our results hold promise for our understanding of microbiome-mediated IBD disease mechanisms and  
490 the potential of using microbiome sequencing of patient stool to classify and potentially even predict  
491 disease.

492

## 493 **Methods**

### 494 *Growth of mice and microbiome sampling*

495 We bred two cohorts of DNR and WT littermate control animals in the Gladstone Institutes mouse  
496 facility as follows. CD4-dnT $\beta$ RII (DNR) animals were crossed to RAG1<sup>-/-</sup> background to eliminate the T  
497 cell mediated IBD, and were transferred from Yale University to Gladstone Institutes in 2010. To initiate  
498 experiments described in this study, DNR-RAG1<sup>-/-</sup> males were bred with C57BL/6N female animals,  
499 and DNR-RAG1<sup>-/+</sup> progeny were again crossed to C57BL/6N females to generate a combination of  
500 RAG1<sup>-/+</sup> and RAG1<sup>+/+</sup> DNR and WT age-matched littermate controls. Animals were given regular  
501 chow consisting of irradiated PicoLab Rodent Diet 20 (LabDiet). Only female animals were used in this  
502 study. Four co-housed WT-RAG1<sup>+/+</sup> and five co-housed DNR-RAG1<sup>+/+</sup> littermates were followed  
503 longitudinally for 15 weeks and fresh fecal samples were collected weekly and stored at -30° C until  
504 they were subject to microbiome processing. All mice from both cohorts were weighed weekly.  
505 All animal experiments were conducted in accordance with guidelines set by the Institutional Animal  
506 Care and Use Committee of the University of California, San Francisco.

507

### 508 *Immune sampling*

509 Tail vein blood samples were collected weekly from a parallel cohort of “bleeder” mice to quantify how  
510 their immune status changes over time (n=6 WT, n=6 DNR). These are distinct individuals from the  
511 “pooper” mice subjected to stool metagenomics (same colony and time period), in order to prevent

512 repeated tail vein blood sampling from affecting the health or microbiota of the cohort of pooper mice.  
513 Specifically, ~100  $\mu$ l (2-3 drops) of blood from tail vein was added to 30  $\mu$ l of 1x heparin (500 units/ml).  
514 500  $\mu$ l of 1x ACK lysis buffer (Lonza) was added directly to the cells and incubated at room temperature  
515 for 2–3 min. Cells were centrifuged at 4000 rpm for 5 min. The top layer was aspirated and another 500  
516 ml of 1x ACK lysis buffer was added followed by centrifugation. Cells were resuspended in FACS buffer  
517 (PBS + 0.5% FBS) and after blocking Fc receptors with anti-CD16/CD32, single-cell suspensions were  
518 incubated with FITC CD4 (GK1.5), PE CD62L (MEL14), PerCP-Cy5.5 CD8a (53.6.72), and APC CD44  
519 (IM7) mouse antibodies for 30 min at 4°C. Stained cells were washed and acquired on an Accuri C6  
520 cytometer (BD). Blood lymphocytes were gated on CD4+ or CD8+ fractions and percentage of  
521 activated/memory (CD44hi) among CD4+ and CD8+ T cells was determined using FlowJo software  
522 (Tree Star Inc.). This cohort was separated from those subjected to microbiome sampling to eliminate  
523 the effect that repeated bloodletting might have on the microbiome. At 15 weeks of age, two WT and  
524 three DNR from the non-bleeding animals were euthanized. Spleen and mesenteric lymph nodes were  
525 then processed into single-cell suspension and subjected to ACK lysis and cell surface staining as  
526 described for PBMCs. The status of T cell activation was quantified and found to highly correlate with  
527 the blood immune status of their “bleeder” littermates ([Additional Data File 2: Figure S2 and Additional](#)  
528 [Data File 3: Table S1](#)).

### 529 *Metagenome sequencing and analysis*

530 QIAamp DNA Stool Mini Kits (QIAGEN, Valencia, CA, USA) were used to extract DNA from  
531 stool samples collected from weeks 4, 6, 8, 10, and 12. Samples were incubated in an elevated water  
532 bath temperature of 95 C to increase the lysis of bacterial cells, as per manufacturer instructions. The  
533 MoBio PowerFecal DNA isolation kit (MOBIO, Carlsbad, CA USA) was used as per manufacturer  
534 instructions to process stool samples collected at weeks 5 and 13. Kit type was adjusted for in  
535 statistical modeling to account for any potential differences in extraction bias between the two methods.

536 Purified DNA was prepared for shotgun metagenomic sequencing using the Nextera XT library  
537 preparation method (ILLUMINA, San Diego, CA USA). Libraries were quality assessed using qPCR and  
538 a Bioanalyzer (Agilent Technologies, Palo Alto, CA USA) and subsequently sequenced using an

539 Illumina HiSeq 2000. This produced an average of 74,427,303 100-bp paired-end sequences per  
540 sample. Metagenomic reads were quality controlled using the standard operating procedure defined by  
541 the Human Microbiome Project Consortium (121) as implemented in shotcleaner (122). Briefly, reads  
542 were quality trimmed using prinseq (123) and mapped against the mouse reference genome sequence  
543 (GRCm38) using bmtagger (124). Exact duplicate reads were collapsed and the subsequent high-  
544 quality data was subject to taxonomic and functional annotation. Functional annotation of  
545 metagenomes was conducted using ShotMAP as described in (16) with, Prodigal (125) to call genes  
546 and RAPsearch2 (126) to identify metagenomic homologs of the KEGG database (downloaded Feb.  
547 2015). Reads mapping to mammalian sequences in the KEGG database were discarded and the  
548 subsequent data was used to quantify the abundance of each KEGG Orthology Group (KO) using the  
549 RPKG abundance statistic (127). Metagenomes were taxonomically annotated using MIDAS as  
550 described in (72).

551

### 552 *Statistical analyses and modeling*

553 The functional and taxonomic similarity between metagenomic samples was assessed using  
554 non-metric multi-dimensional scaling (NMDS) as implemented through the nmDS function in the labdsv  
555 R package (128). Ordinations were visualized using the ordiplot function in the vegan R package (129).  
556 For the functional similarity analysis, the vegdist function from the vegan R package quantified the  
557 Bray-Curtis dissimilarity based on KEGG module abundances. The taxonomic analysis used the  
558 generalized Unifrac (130) distances ( $\alpha=0.5$ ), which were obtained by using the taxonomic tree from  
559 the Living Tree Project (131) and matching the genus and species component of tree leaf labels to the  
560 corresponding components of the MIDAS species labels in our data. Assessment of the significance of  
561 the clustering of samples in these ordination plots was conducted using PERMANOVA as implemented  
562 by the adonis function in R.

563 The compound Poisson generalized linear mixed effects model implemented in the cplm  
564 package in R (132) was used to find KEGG modules with a significantly different time trend between  
565 groups while controlling for static differences between the lines and DNA extraction procedure

566 (QIAGEN versus MOBIO). Random intercepts and slopes for both subjects and contributing KOs were  
567 used to capture variation between subjects and between genes while focusing on the large scale shifts  
568 over the whole collection of abundance profiles contributing to a module. As described more thoroughly  
569 in Supplementary Text S1, the general computational procedure consisted of subsetting the data to  
570 each module's relevant KO abundances and fitting a full model that described the RPKG abundance as  
571 a function of time, group, time by group interaction, sequencing kit and random effects of each KO and  
572 individual. We then use two reduced models, dropping first the interaction term and then the group  
573 term, to obtain p-values via likelihood ratio tests. This is one of the recommended significance testing  
574 approaches for mixed models since it avoids using approximations for the residual degrees of freedom  
575 that would be necessary to test significance via the t-statistic (66). To limit the number of modules  
576 tested, the input data were run through the MinPath algorithm (133) to select a parsimonious set of  
577 modules based on the KOs present. The union of all samples' individual parsimonious sets was used  
578 as the final set of tested modules. The approach of testing the dynamics of an entire module by fitting a  
579 single GLMM to a set of multiple genes' temporal abundances is modeled on the TcGSA method of  
580 Hejblum et al. (134), with the modification of using a different response distribution (the Tweedie  
581 compound Poisson). Significant modules were selected at the 0.05 FDR threshold after controlling for  
582 multiple testing via the Benjamini-Hochberg procedure (B-H). Species time trend differences were  
583 tested with the same approach, minus the grouping of multiple trajectories. Additional details of our  
584 modeling approach can be found in Additional Data File 5: Text S1. All of the code used in this analysis  
585 is available at the following URL:

586 [https://github.com/slyalina/Mouse\\_IBD\\_2017\\_paper\\_supporting\\_code](https://github.com/slyalina/Mouse_IBD_2017_paper_supporting_code).

587 To differentiate functional changes occurring prior to immune activation, we fit a second hinge  
588 regression to the abundances of modules that were found to have a significant time by group  
589 interaction in the main GLMM analysis. This second regression placed a break point at week 7, which  
590 represents the point at which immune activation initiated (Fig. 1). This allowed for two sets of slopes  
591 (before disease onset and after) and two sets of time by group interactions (representing deviations of  
592 DNR slopes from WT before-onset and after-onset slopes).

593 Alterations in the species trajectory curves were additionally tested with an alternate method  
594 aimed at highlighting differences in shape rather than slope. This method was an implementation of the  
595 FPCA-based difference in goodness-of-fit approach described previously in (135). The permutation-  
596 based p-values from this analysis were B-H corrected and species passing the 0.05 FDR threshold  
597 were retained.

598 To test the hypothesis that the distribution of all modules' between-KO/within-KO dispersion  
599 decomposition statistic is significantly different from random when grouping functional trajectories (KOs  
600 into modules) but is not significantly different from random when grouping taxonomic trajectories  
601 (species into genera) we used the DISCO (71) non-parametric test to obtain the real distributions of the  
602 test statistic in the two scenarios, as well the simulated null distributions that arise when generating  
603 random groupings of KOs and species. We then performed a Kolmogorov-Smirnov test to compare the  
604 true distributions with their simulated counterparts.

605

#### 606 **Accession numbers**

607 Metagenomic sequences are available through GenBank accessions SAMN06921515 -  
608 SAMN06921563.

609

#### 610 **Acknowledgements**

611 We are grateful to Stephen Nayfach for helpful discussions. We also appreciate the services provided  
612 by the Gladstone genomics core, UCSF sequencing core, and the Center for Genome Research and  
613 Biocomputing.

614

#### 615 **Competing Interests**

616 The authors declare that they have no competing interests.

617

#### 618 **Funding**

619 This project was supported by NIAID R21 grant #AI108953 and the Gladstone Institutes.

620

621



622 **Figure Legends**

623

624 **Figure 1. IBD development correlates with peripheral T cell activation in DNR mice.** (A) Animal  
625 weight over time. N= 7 WT and 8 DNR mice. (B) Percent of activated CD4 T cells among peripheral  
626 blood mono-nuclear cells (PBMCs). (C) Percent of activated CD8 T cells among PBMCs. (B-C) N=6  
627 WT and 6 DNR mice.

628

629 **Figure 2. The taxonomic and functional diversity of the gut microbiome associates with IBD**  
630 **development.** (A) NMDS ordination plots of the functional (left) and taxonomic (right) beta-diversity of  
631 samples from each line illustrate the significant divergence in beta-diversity between lines over time.  
632 Functional beta-diversity was measured as the Bray-Curtis dissimilarity based on KEGG module  
633 abundances, while taxonomic beta-diversity is the UniFrac distance of taxa detected in metagenomes.  
634 (B) The longitudinal variation of samples along selected NMDS dimensions similarly reveals how DNR  
635 and WT lines significantly diverge over time both in terms of their functional (left) and taxonomic (right)  
636 beta-diversity. Plotted is the smoothed LOESS trajectory of samples from each line over time, where  
637 grey areas represent 95% confidence intervals.

638

639 **Figure 3. Summary of GLMM results of 29 modules with significant time by group interaction.**

640 (A) The quantity plotted is the predicted marginal mean (PMM) of the slope coefficients. Significance  
641 testing was done by comparing goodness of fit of full and reduced GLMM specifications, and the full  
642 model was used to produce the PMM estimates shown here. This quantity was primarily calculated to  
643 get a succinct summary of the direction of temporal change, and does not always coincide with the  
644 interaction coefficient that is the focus of the main analysis. The estimates were obtained by running the  
645 *lstrends* function from the *lsmeans* R package (136) (B) The underlying KO abundance trajectories of a  
646 significant module (M00031: Lysine biosynthesis) that decreases in DNR mice and increases in WT  
647 mice over time, as evidenced by a negative and positive model slope, respectively. (C) A similar plot as  
648 in (B), except that this significant module (M00330: Adhesin transport) significantly increases in

649 abundance over time in DNR mice, while it does not change in abundance in WT mice. For both (B)  
650 and (C) the shaded ribbons represent LOESS confidence bounds.

651

652 **Figure 4. Modules with significantly differing slopes between groups show primarily post-**  
653 **disease-onset differences when analyzed with a segmented GLMM.** For each cohort, the  
654 segmented GLMM estimates two separate WT slopes (pre-week7 and post-week7) and two deviations  
655 from those slopes, which represent the time by group interaction that measures how DNR slopes differ  
656 from WT slopes. Plotted here are the estimates of these deviations, with asterisks marking coefficients  
657 that were significantly non-zero with B-H corrected p-value of  $<0.2$

658

659 **Figure 5. Species that showed significantly different trajectory shapes between DNR and WT**  
660 **groups.** These results are based on an FPCA-based goodness-of-fit comparison test that identified 7  
661 species that were different at B-H corrected p-value  $< 0.05$ .

662

663

664 **Table Legends**

665

666 **Table 1** - Species with significantly different trajectory shapes in the FPCA-based goodness-of-fit

667 comparisons.

668

669

670

## References

- 671 1. Huttenhower C, Kostic AD, Xavier RJ. 2014. Inflammatory bowel disease as a model for  
672 translating the microbiome. *Immunity* 40:843-54.
- 673 2. Wlodarska M, Kostic AD, Xavier RJ. 2015. An integrative view of microbiome-host interactions  
674 in inflammatory bowel diseases. *Cell Host Microbe* 17:577-91.
- 675 3. Ayres JS. 2016. Cooperative Microbial Tolerance Behaviors in Host-Microbiota Mutualism. *Cell*  
676 165:1323-31.
- 677 4. Kostic AD, Xavier RJ, Gevers D. 2014. The microbiome in inflammatory bowel disease: current  
678 status and the future ahead. *Gastroenterology* 146:1489-99.
- 679 5. Lees CW, Barrett JC, Parkes M, Satsangi J. 2011. New IBD genetics: common pathways with  
680 other diseases. *Gut* 60:1739-53.
- 681 6. Wirtz S, Neurath MF. 2007. Mouse models of inflammatory bowel disease. *Adv Drug Deliv Rev*  
682 59:1073-83.
- 683 7. Goodrich JK, Waters JL, Poole AC, Sutter JL, Koren O, Blekhman R, Beaumont M, Van Treuren  
684 W, Knight R, Bell JT, Spector TD, Clark AG, Ley RE. 2014. Human genetics shape the gut  
685 microbiome. *Cell* 159:789-99.
- 686 8. Neuman MG, Nanau RM. 2012. Inflammatory bowel disease: role of diet, microbiota, life style.  
687 *Transl Res* 160:29-44.
- 688 9. Bilski J, Mazur-Bialy A, Brzozowski B, Magierowski M, Zahradnik-Bilska J, Wojcik D,  
689 Magierowska K, Kwiecien S, Mach T, Brzozowski T. 2016. Can exercise affect the course of  
690 inflammatory bowel disease? Experimental and clinical evidence. *Pharmacol Rep* 68:827-36.
- 691 10. Sartor RB, Mazmanian SK. 2012. Intestinal Microbes in Inflammatory Bowel Diseases. *Am J*  
692 *Gastroenterol Suppl* 1:15-21.
- 693 11. Qin J, Li R, Raes J, Arumugam M, Burgdorf KS, Manichanh C, Nielsen T, Pons N, Levenez F,  
694 Yamada T, Mende DR, Li J, Xu J, Li S, Li D, Cao J, Wang B, Liang H, Zheng H, Xie Y, Tap J,  
695 Lepage P, Bertalan M, Batto JM, Hansen T, Le Paslier D, Linneberg A, Nielsen HB, Pelletier E,  
696 Renault P, Sicheritz-Ponten T, Turner K, Zhu H, Yu C, Li S, Jian M, Zhou Y, Li Y, Zhang X, Li S,  
697 Qin N, Yang H, Wang J, Brunak S, Dore J, Guarner F, Kristiansen K, Pedersen O, Parkhill J,  
698 Weissenbach J, Meta HITC, Bork P, Ehrlich SD, Wang J. 2010. A human gut microbial gene  
699 catalogue established by metagenomic sequencing. *Nature* 464:59-65.
- 700 12. Nielsen HB, Almeida M, Juncker AS, Rasmussen S, Li J, Sunagawa S, Plichta DR, Gautier L,  
701 Pedersen AG, Le Chatelier E, Pelletier E, Bonde I, Nielsen T, Manichanh C, Arumugam M,  
702 Batto JM, Quintanilha Dos Santos MB, Blom N, Borruel N, Burgdorf KS, Boumezbeur F,  
703 Casellas F, Dore J, Dworzynski P, Guarner F, Hansen T, Hildebrand F, Kaas RS, Kennedy S,  
704 Kristiansen K, Kultima JR, Leonard P, Levenez F, Lund O, Moumen B, Le Paslier D, Pons N,  
705 Pedersen O, Prifti E, Qin J, Raes J, Sorensen S, Tap J, Tims S, Ussery DW, Yamada T, Meta  
706 HITC, Renault P, Sicheritz-Ponten T, Bork P, Wang J, Brunak S, Ehrlich SD, Meta HITC. 2014.  
707 Identification and assembly of genomes and genetic elements in complex metagenomic  
708 samples without using reference genomes. *Nat Biotechnol* 32:822-8.
- 709 13. Morgan XC, Tickle TL, Sokol H, Gevers D, Devaney KL, Ward DV, Reyes JA, Shah SA, LeLeiko  
710 N, Snapper SB, Bousvaros A, Korzenik J, Sands BE, Xavier RJ, Huttenhower C. 2012.  
711 Dysfunction of the intestinal microbiome in inflammatory bowel disease and treatment. *Genome*  
712 *Biol* 13:R79.
- 713 14. Ott SJ, Musfeldt M, Wenderoth DF, Hampe J, Brant O, Folsch UR, Timmis KN, Schreiber S.  
714 2004. Reduction in diversity of the colonic mucosa associated bacterial microflora in patients  
715 with active inflammatory bowel disease. *Gut* 53:685-93.
- 716 15. Dubinsky M, Braun J. 2015. Diagnostic and Prognostic Microbial Biomarkers in Inflammatory  
717 Bowel Diseases. *Gastroenterology* 149:1265-1274 e3.
- 718 16. Nayfach S, Bradley PH, Wyman SK, Laurent TJ, Williams A, Eisen JA, Pollard KS, Sharpton TJ.  
719 2015. Automated and Accurate Estimation of Gene Family Abundance from Shotgun  
720 Metagenomes. *PLoS Comput Biol* 11:e1004573.

- 721 17. Atarashi K, Tanoue T, Shima T, Imaoka A, Kuwahara T, Momose Y, Cheng G, Yamasaki S,  
722 Saito T, Ohba Y, Taniguchi T, Takeda K, Hori S, Ivanov, II, Umesaki Y, Itoh K, Honda K. 2011.  
723 Induction of colonic regulatory T cells by indigenous Clostridium species. *Science* 331:337-41.
- 724 18. Honda K, Littman DR. 2012. The microbiome in infectious disease and inflammation. *Annu Rev*  
725 *Immunol* 30:759-95.
- 726 19. Chu H, Khosravi A, Kusumawardhani IP, Kwon AH, Vasconcelos AC, Cunha LD, Mayer AE,  
727 Shen Y, Wu WL, Kambal A, Targan SR, Xavier RJ, Ernst PB, Green DR, McGovern DP, Virgin  
728 HW, Mazmanian SK. 2016. Gene-microbiota interactions contribute to the pathogenesis of  
729 inflammatory bowel disease. *Science* 352:1116-20.
- 730 20. David LA, Maurice CF, Carmody RN, Gootenberg DB, Button JE, Wolfe BE, Ling AV, Devlin AS,  
731 Varma Y, Fischbach MA, Biddinger SB, Dutton RJ, Turnbaugh PJ. 2014. Diet rapidly and  
732 reproducibly alters the human gut microbiome. *Nature* 505:559-63.
- 733 21. Carmody RN, Gerber GK, Luevano JM, Jr., Gatti DM, Somes L, Svenson KL, Turnbaugh PJ.  
734 2015. Diet dominates host genotype in shaping the murine gut microbiota. *Cell Host Microbe*  
735 17:72-84.
- 736 22. Rooks MG, Veiga P, Wardwell-Scott LH, Tickle T, Segata N, Michaud M, Gallini CA, Beal C,  
737 van Hylckama-Vlieg JE, Ballal SA, Morgan XC, Glickman JN, Gevers D, Huttenhower C, Garrett  
738 WS. 2014. Gut microbiome composition and function in experimental colitis during active  
739 disease and treatment-induced remission. *ISME J* 8:1403-17.
- 740 23. Strober W, Fuss IJ, Blumberg RS. 2002. The immunology of mucosal models of inflammation.  
741 *Annu Rev Immunol* 20:495-549.
- 742 24. Bouma G, Strober W. 2003. The immunological and genetic basis of inflammatory bowel  
743 disease. *Nat Rev Immunol* 3:521-33.
- 744 25. Hoffmann JC, Pawlowski NN, Kuhl AA, Hohne W, Zeitz M. 2002. Animal models of inflammatory  
745 bowel disease: an overview. *Pathobiology* 70:121-30.
- 746 26. Mizoguchi A, Mizoguchi E, Bhan AK. 2003. Immune networks in animal models of inflammatory  
747 bowel disease. *Inflamm Bowel Dis* 9:246-59.
- 748 27. Elson CO, Cong Y, McCracken VJ, Dimmitt RA, Lorenz RG, Weaver CT. 2005. Experimental  
749 models of inflammatory bowel disease reveal innate, adaptive, and regulatory mechanisms of  
750 host dialogue with the microbiota. *Immunol Rev* 206:260-76.
- 751 28. Valatas V, Vakas M, Kolios G. 2013. The value of experimental models of colitis in predicting  
752 efficacy of biological therapies for inflammatory bowel diseases. *Am J Physiol Gastrointest Liver*  
753 *Physiol* 305:G763-85.
- 754 29. Valatas V, Bamias G, Kolios G. 2015. Experimental colitis models: Insights into the  
755 pathogenesis of inflammatory bowel disease and translational issues. *Eur J Pharmacol*  
756 759:253-64.
- 757 30. Gorelik L, Flavell RA. 2000. Abrogation of TGFbeta signaling in T cells leads to spontaneous T  
758 cell differentiation and autoimmune disease. *Immunity* 12:171-81.
- 759 31. Yamagiwa S, Gray JD, Hashimoto S, Horwitz DA. 2001. A role for TGF-beta in the generation  
760 and expansion of CD4+CD25+ regulatory T cells from human peripheral blood. *J Immunol*  
761 166:7282-9.
- 762 32. Chen W, Jin W, Hardegen N, Lei KJ, Li L, Marinos N, McGrady G, Wahl SM. 2003. Conversion  
763 of peripheral CD4+CD25- naive T cells to CD4+CD25+ regulatory T cells by TGF-beta induction  
764 of transcription factor Foxp3. *J Exp Med* 198:1875-86.
- 765 33. Schlenner SM, Weigmann B, Ruan Q, Chen Y, von Boehmer H. 2012. Smad3 binding to the  
766 foxp3 enhancer is dispensable for the development of regulatory T cells with the exception of  
767 the gut. *J Exp Med* 209:1529-35.
- 768 34. Selvaraj RK, Geiger TL. 2007. A kinetic and dynamic analysis of Foxp3 induced in T cells by  
769 TGF-beta. *J Immunol* 178:7667-77.
- 770 35. Fantini MC, Becker C, Monteleone G, Pallone F, Galle PR, Neurath MF. 2004. Cutting edge:  
771 TGF-beta induces a regulatory phenotype in CD4+CD25- T cells through Foxp3 induction and  
772 down-regulation of Smad7. *J Immunol* 172:5149-53.

- 773 36. Huber S, Schramm C, Lehr HA, Mann A, Schmitt S, Becker C, Protschka M, Galle PR, Neurath  
774 MF, Blessing M. 2004. Cutting edge: TGF-beta signaling is required for the in vivo expansion  
775 and immunosuppressive capacity of regulatory CD4+CD25+ T cells. *J Immunol* 173:6526-31.
- 776 37. Marie JC, Letterio JJ, Gavin M, Rudensky AY. 2005. TGF-beta1 maintains suppressor function  
777 and Foxp3 expression in CD4+CD25+ regulatory T cells. *J Exp Med* 201:1061-7.
- 778 38. Battaglia A, Buzzonetti A, Baranello C, Fanelli M, Fossati M, Catzola V, Scambia G, Fattorossi  
779 A. 2013. Interleukin-21 (IL-21) synergizes with IL-2 to enhance T-cell receptor-induced human  
780 T-cell proliferation and counteracts IL-2/transforming growth factor-beta-induced regulatory T-  
781 cell development. *Immunology* 139:109-20.
- 782 39. Molinero LL, Miller ML, Evaristo C, Alegre ML. 2011. High TCR stimuli prevent induced  
783 regulatory T cell differentiation in a NF-kappaB-dependent manner. *J Immunol* 186:4609-17.
- 784 40. Bettelli E, Carrier Y, Gao W, Korn T, Strom TB, Oukka M, Weiner HL, Kuchroo VK. 2006.  
785 Reciprocal developmental pathways for the generation of pathogenic effector TH17 and  
786 regulatory T cells. *Nature* 441:235-8.
- 787 41. Veldhoen M, Stockinger B. 2006. TGFbeta1, a "Jack of all trades": the link with pro-  
788 inflammatory IL-17-producing T cells. *Trends Immunol* 27:358-61.
- 789 42. Li MO, Wan YY, Flavell RA. 2007. T cell-produced transforming growth factor-beta1 controls T  
790 cell tolerance and regulates Th1- and Th17-cell differentiation. *Immunity* 26:579-91.
- 791 43. Gutcher I, Donkor MK, Ma Q, Rudensky AY, Flavell RA, Li MO. 2011. Autocrine transforming  
792 growth factor-beta1 promotes in vivo Th17 cell differentiation. *Immunity* 34:396-408.
- 793 44. Manel N, Unutmaz D, Littman DR. 2008. The differentiation of human T(H)-17 cells requires  
794 transforming growth factor-beta and induction of the nuclear receptor RORgamma. *Nat*  
795 *Immunol* 9:641-9.
- 796 45. Yang L, Anderson DE, Baecher-Allan C, Hastings WD, Bettelli E, Oukka M, Kuchroo VK, Hafler  
797 DA. 2008. IL-21 and TGF-beta are required for differentiation of human T(H)17 cells. *Nature*  
798 454:350-2.
- 799 46. Biancheri P, Giuffrida P, Docena GH, MacDonald TT, Corazza GR, Di Sabatino A. 2014. The  
800 role of transforming growth factor (TGF)-beta in modulating the immune response and  
801 fibrogenesis in the gut. *Cytokine Growth Factor Rev* 25:45-55.
- 802 47. Di Giacinto C, Marinaro M, Sanchez M, Strober W, Boirivant M. 2005. Probiotics ameliorate  
803 recurrent Th1-mediated murine colitis by inducing IL-10 and IL-10-dependent TGF-beta-bearing  
804 regulatory cells. *J Immunol* 174:3237-46.
- 805 48. Feagins LA. 2010. Role of transforming growth factor-beta in inflammatory bowel disease and  
806 colitis-associated colon cancer. *Inflamm Bowel Dis* 16:1963-8.
- 807 49. Fuss IJ, Boirivant M, Lacy B, Strober W. 2002. The interrelated roles of TGF-beta and IL-10 in  
808 the regulation of experimental colitis. *J Immunol* 168:900-8.
- 809 50. Harrison OJ, Powrie FM. 2013. Regulatory T cells and immune tolerance in the intestine. *Cold*  
810 *Spring Harb Perspect Biol* 5.
- 811 51. Izcue A, Coombes JL, Powrie F. 2009. Regulatory lymphocytes and intestinal inflammation.  
812 *Annu Rev Immunol* 27:313-38.
- 813 52. Jarry A, Bossard C, Sarrabayrouse G, Mosnier JF, Laboisie CL. 2011. Loss of interleukin-10 or  
814 transforming growth factor beta signaling in the human colon initiates a T-helper 1 response via  
815 distinct pathways. *Gastroenterology* 141:1887-96 e1-2.
- 816 53. Kitani A, Fuss I, Nakamura K, Kumaki F, Usui T, Strober W. 2003. Transforming growth factor  
817 (TGF)-beta1-producing regulatory T cells induce Smad-mediated interleukin 10 secretion that  
818 facilitates coordinated immunoregulatory activity and amelioration of TGF-beta1-mediated  
819 fibrosis. *J Exp Med* 198:1179-88.
- 820 54. Weiner HL. 2001. Induction and mechanism of action of transforming growth factor-beta-  
821 secreting Th3 regulatory cells. *Immunol Rev* 182:207-14.
- 822 55. Franke A, McGovern DP, Barrett JC, Wang K, Radford-Smith GL, Ahmad T, Lees CW,  
823 Balschun T, Lee J, Roberts R, Anderson CA, Bis JC, Bumpstead S, Ellinghaus D, Festen EM,  
824 Georges M, Green T, Haritunians T, Jostins L, Latiano A, Mathew CG, Montgomery GW,  
825 Prescott NJ, Raychaudhuri S, Rotter JI, Schumm P, Sharma Y, Simms LA, Taylor KD,  
826 Whiteman D, Wijmenga C, Baldassano RN, Barclay M, Bayless TM, Brand S, Buning C, Cohen

- 827 A, Colombel JF, Cottone M, Stronati L, Denson T, De Vos M, D'Inca R, Dubinsky M, Edwards C,  
828 Florin T, Franchimont D, Geary R, Glas J, Van Gossum A, Guthery SL, Halfvarson J,  
829 Verspaget HW, Hugot JP, Karban A, Laukens D, Lawrance I, Lemann M, Levine A, Libioulle C,  
830 Louis E, Mowat C, Newman W, Panes J, Phillips A, Proctor DD, Regueiro M, Russell R,  
831 Rutgeerts P, Sanderson J, Sans M, Seibold F, Steinhart AH, Stokkers PC, Torkvist L, Kullak-  
832 Ublick G, Wilson D, Walters T, Targan SR, Brant SR, Rioux JD, D'Amato M, Weersma RK,  
833 Kugathasan S, Griffiths AM, Mansfield JC, Vermeire S, Duerr RH, Silverberg MS, Satsangi J,  
834 Schreiber S, Cho JH, Annese V, Hakonarson H, Daly MJ, Parkes M. 2010. Genome-wide meta-  
835 analysis increases to 71 the number of confirmed Crohn's disease susceptibility loci. *Nat Genet*  
836 42:1118-25.
- 837 56. Glocker EO, Kotlarz D, Boztug K, Gertz EM, Schaffer AA, Noyan F, Perro M, Diestelhorst J,  
838 Allroth A, Murugan D, Hatscher N, Pfeifer D, Sykora KW, Sauer M, Kreipe H, Lacher M,  
839 Nustede R, Woellner C, Baumann U, Salzer U, Koletzko S, Shah N, Segal AW, Sauerbrey A,  
840 Buderus S, Snapper SB, Gimbacher B, Klein C. 2009. Inflammatory bowel disease and  
841 mutations affecting the interleukin-10 receptor. *The New England journal of medicine* 361:2033-  
842 45.
- 843 57. McGovern DP, Gardet A, Torkvist L, Goyette P, Essers J, Taylor KD, Neale BM, Ong RT,  
844 Lagace C, Li C, Green T, Stevens CR, Beauchamp C, Fleshner PR, Carlson M, D'Amato M,  
845 Halfvarson J, Hibberd ML, Lordal M, Padyukov L, Andriulli A, Colombo E, Latiano A, Palmieri O,  
846 Bernard EJ, Deslandres C, Hommes DW, de Jong DJ, Stokkers PC, Weersma RK, Sharma Y,  
847 Silverberg MS, Cho JH, Wu J, Roeder K, Brant SR, Schumm LP, Duerr RH, Dubinsky MC,  
848 Glazer NL, Haritunians T, Ippoliti A, Melmed GY, Siscovick DS, Vasilias EA, Targan SR,  
849 Annese V, Wijmenga C, Pettersson S, Rotter JI, Xavier RJ, Daly MJ, Rioux JD, Seielstad M.  
850 2010. Genome-wide association identifies multiple ulcerative colitis susceptibility loci. *Nat Genet*  
851 42:332-7.
- 852 58. Naviglio S, Arrigo S, Martelossi S, Villanacci V, Tommasini A, Loganes C, Fabretto A, Vignola  
853 S, Lonardi S, Ventura A. 2014. Severe inflammatory bowel disease associated with congenital  
854 alteration of transforming growth factor beta signaling. *J Crohns Colitis* 8:770-4.
- 855 59. Kang SS, Bloom SM, Norian LA, Geske MJ, Flavell RA, Stappenbeck TS, Allen PM. 2008. An  
856 antibiotic-responsive mouse model of fulminant ulcerative colitis. *PLoS Med* 5:e41.
- 857 60. Fowler SA, Ananthakrishnan AN, Gardet A, Stevens CR, Korzenik JR, Sands BE, Daly MJ,  
858 Xavier RJ, Yajnik V. 2014. SMAD3 gene variant is a risk factor for recurrent surgery in patients  
859 with Crohn's disease. *J Crohns Colitis* 8:845-51.
- 860 61. Cho JH, Brant SR. 2011. Recent insights into the genetics of inflammatory bowel disease.  
861 *Gastroenterology* 140:1704-12.
- 862 62. Henderson P, van Limbergen JE, Wilson DC, Satsangi J, Russell RK. 2011. Genetics of  
863 childhood-onset inflammatory bowel disease. *Inflamm Bowel Dis* 17:346-61.
- 864 63. Ardizzone S, Bevivino G, Monteleone G. 2016. Mongersen, an oral Smad7 antisense  
865 oligonucleotide, in patients with active Crohn's disease. *Therap Adv Gastroenterol* 9:527-32.
- 866 64. Laudisi F, Dinallo V, Di Fusco D, Monteleone G. 2016. Smad7 and its Potential as Therapeutic  
867 Target in Inflammatory Bowel Diseases. *Curr Drug Metab* 17:303-6.
- 868 65. Monteleone G, Boirivant M, Pallone F, MacDonald TT. 2008. TGF-beta1 and Smad7 in the  
869 regulation of IBD. *Mucosal Immunol* 1 Suppl 1:S50-3.
- 870 66. Bolker BM, Brooks ME, Clark CJ, Geange SW, Poulsen JR, Stevens MH, White JS. 2009.  
871 Generalized linear mixed models: a practical guide for ecology and evolution. *Trends Ecol Evol*  
872 24:127-35.
- 873 67. Szekely GJ, Rizzo ML. 2009. Brownian distance covariance. *Ann Appl Stat* 3:1236-1265.
- 874 68. Baumler AJ, Sperandio V. 2016. Interactions between the microbiota and pathogenic bacteria in  
875 the gut. *Nature* 535:85-93.
- 876 69. Byndloss MX, Rivera-Chavez F, Tsolis RM, Baumler AJ. 2016. How bacterial pathogens use  
877 type III and type IV secretion systems to facilitate their transmission. *Curr Opin Microbiol* 35:1-7.
- 878 70. Mark Welch JL, Utter DR, Rossetti BJ, Mark Welch DB, Eren AM, Borisy GG. 2014. Dynamics  
879 of tongue microbial communities with single-nucleotide resolution using oligotyping. *Front*  
880 *Microbiol* 5:568.

- 881 71. Rizzo ML, Szekely GJ. 2010. DISCO analysis: A nonparametric extension of analysis of  
882 variance. *Ann Appl Stat* 4:1034-1055.
- 883 72. Nayfach S, Rodriguez-Mueller B, Garud N, Pollard KS. 2016. An integrated metagenomics  
884 pipeline for strain profiling reveals novel patterns of bacterial transmission and biogeography.  
885 *Genome Res* 26:1612-1625.
- 886 73. Prindiville TP, Sheikh RA, Cohen SH, Tang YJ, Cantrell MC, Silva J, Jr. 2000. *Bacteroides*  
887 *fragilis* enterotoxin gene sequences in patients with inflammatory bowel disease. *Emerg Infect*  
888 *Dis* 6:171-4.
- 889 74. Rabizadeh S, Rhee KJ, Wu S, Huso D, Gan CM, Golub JE, Wu X, Zhang M, Sears CL. 2007.  
890 Enterotoxigenic *Bacteroides fragilis*: a potential instigator of colitis. *Inflamm Bowel Dis* 13:1475-  
891 83.
- 892 75. Bloom SM, Bijanki VN, Nava GM, Sun L, Malvin NP, Donermeyer DL, Dunne WM, Jr., Allen PM,  
893 Stappenbeck TS. 2011. Commensal *Bacteroides* species induce colitis in host-genotype-  
894 specific fashion in a mouse model of inflammatory bowel disease. *Cell Host Microbe* 9:390-403.
- 895 76. Conley MN, Wong CP, Duyck KM, Hord N, Ho E, Sharpton TJ. 2016. Aging and serum MCP-1  
896 are associated with gut microbiome composition in a murine model. *PeerJ* 4:e1854.
- 897 77. Sartor RB. 2008. Microbial influences in inflammatory bowel diseases. *Gastroenterology*  
898 134:577-94.
- 899 78. Kaur N, Chen CC, Luther J, Kao JY. 2011. Intestinal dysbiosis in inflammatory bowel disease.  
900 *Gut Microbes* 2:211-6.
- 901 79. Sellon RK, Tonkonogy S, Schultz M, Dieleman LA, Grenther W, Balish E, Rennick DM, Sartor  
902 RB. 1998. Resident enteric bacteria are necessary for development of spontaneous colitis and  
903 immune system activation in interleukin-10-deficient mice. *Infect Immun* 66:5224-31.
- 904 80. Garrett WS, Gallini CA, Yatsunencko T, Michaud M, DuBois A, Delaney ML, Punit S, Karlsson M,  
905 Bry L, Glickman JN, Gordon JI, Onderdonk AB, Glimcher LH. 2010. Enterobacteriaceae act in  
906 concert with the gut microbiota to induce spontaneous and maternally transmitted colitis. *Cell*  
907 *Host Microbe* 8:292-300.
- 908 81. Chichlowski M, Westwood GS, Abraham SN, Hale LP. 2010. Role of mast cells in inflammatory  
909 bowel disease and inflammation-associated colorectal neoplasia in IL-10-deficient mice. *PLoS*  
910 *One* 5:e12220.
- 911 82. Waidmann M, Bechtold O, Frick JS, Lehr HA, Schubert S, Dobrindt U, Loeffler J, Bohn E,  
912 Autenrieth IB. 2003. *Bacteroides vulgatus* protects against *Escherichia coli*-induced colitis in  
913 gnotobiotic interleukin-2-deficient mice. *Gastroenterology* 125:162-77.
- 914 83. Frank DN, St Amand AL, Feldman RA, Boedeker EC, Harpaz N, Pace NR. 2007. Molecular-  
915 phylogenetic characterization of microbial community imbalances in human inflammatory bowel  
916 diseases. *Proc Natl Acad Sci U S A* 104:13780-5.
- 917 84. Sokol H, Seksik P, Rigottier-Gois L, Lay C, Lepage P, Podglajen I, Marteau P, Dore J. 2006.  
918 Specificities of the fecal microbiota in inflammatory bowel disease. *Inflamm Bowel Dis* 12:106-  
919 11.
- 920 85. Peterson DA, Frank DN, Pace NR, Gordon JI. 2008. Metagenomic approaches for defining the  
921 pathogenesis of inflammatory bowel diseases. *Cell Host Microbe* 3:417-27.
- 922 86. Sokol H, Seksik P, Furet JP, Firmesse O, Nion-Larmurier I, Beaugerie L, Cosnes J, Corthier G,  
923 Marteau P, Dore J. 2009. Low counts of *Faecalibacterium prausnitzii* in colitis microbiota.  
924 *Inflamm Bowel Dis* 15:1183-9.
- 925 87. Pasolli E, Truong DT, Malik F, Waldron L, Segata N. 2016. Machine Learning Meta-analysis of  
926 Large Metagenomic Datasets: Tools and Biological Insights. *PLoS Comput Biol* 12:e1004977.
- 927 88. Casellas F, Borrueal N, Papo M, Guarner F, Antolin M, Videla S, Malagelada JR. 1998.  
928 Antiinflammatory effects of enterically coated amoxicillin-clavulanic acid in active ulcerative  
929 colitis. *Inflamm Bowel Dis* 4:1-5.
- 930 89. Rietdijk ST, D'Haens GR. 2013. Recent developments in the treatment of inflammatory bowel  
931 disease. *J Dig Dis* 14:282-7.
- 932 90. Gusils C, Morata V, Gonzalez S. 2004. Determination of bacterial adhesion to intestinal mucus.  
933 *Methods Mol Biol* 268:411-5.



- 934 91. Murch SH, MacDonald TT, Walker-Smith JA, Levin M, Lionetti P, Klein NJ. 1993. Disruption of  
935 sulphated glycosaminoglycans in intestinal inflammation. *Lancet* 341:711-4.
- 936 92. Benjdia A, Martens EC, Gordon JI, Berteau O. 2011. Sulfatases and a radical S-adenosyl-L-  
937 methionine (AdoMet) enzyme are key for mucosal foraging and fitness of the prominent human  
938 gut symbiont, *Bacteroides thetaiotaomicron*. *J Biol Chem* 286:25973-82.
- 939 93. Ulmer JE, Vilen EM, Namburi RB, Benjdia A, Beneteau J, Malleron A, Bonnaffe D, Driguez PA,  
940 Descroix K, Lassalle G, Le Narvor C, Sandstrom C, Spillmann D, Berteau O. 2014.  
941 Characterization of glycosaminoglycan (GAG) sulfatases from the human gut symbiont  
942 *Bacteroides thetaiotaomicron* reveals the first GAG-specific bacterial endosulfatase. *J Biol*  
943 *Chem* 289:24289-303.
- 944 94. Nayfach S, Bradley PH, Wyman SK, Laurent TJ, Williams A, Eisen JA, Pollard KS, Sharpston TJ.  
945 2015. Automated and accurate estimation of gene family abundance from shotgun  
946 metagenomes doi:10.1101/022335.
- 947 95. Heuston S, Begley M, Gahan CG, Hill C. 2012. Isoprenoid biosynthesis in bacterial pathogens.  
948 *Microbiology* 158:1389-401.
- 949 96. Pereira C, Gracio D, Teixeira JP, Magro F. 2015. Oxidative Stress and DNA Damage:  
950 Implications in Inflammatory Bowel Disease. *Inflamm Bowel Dis* 21:2403-17.
- 951 97. Steiner TS. 2007. How flagellin and toll-like receptor 5 contribute to enteric infection. *Infect*  
952 *Immun* 75:545-52.
- 953 98. Cullender TC, Chassaing B, Janzon A, Kumar K, Muller CE, Werner JJ, Angenent LT, Bell ME,  
954 Hay AG, Peterson DA, Walter J, Vijay-Kumar M, Gewirtz AT, Ley RE. 2013. Innate and adaptive  
955 immunity interact to quench microbiome flagellar motility in the gut. *Cell Host Microbe* 14:571-  
956 81.
- 957 99. Michielan A, D'Inca R. 2015. Intestinal Permeability in Inflammatory Bowel Disease:  
958 Pathogenesis, Clinical Evaluation, and Therapy of Leaky Gut. *Mediators Inflamm* 2015:628157.
- 959 100. Nugent SG, Kumar D, Rampton DS, Evans DF. 2001. Intestinal luminal pH in inflammatory  
960 bowel disease: possible determinants and implications for therapy with aminosalicylates and  
961 other drugs. *Gut* 48:571-7.
- 962 101. Wang Z, Klipfell E, Bennett BJ, Koeth R, Levison BS, Dugar B, Feldstein AE, Britt EB, Fu X,  
963 Chung YM, Wu Y, Schauer P, Smith JD, Allayee H, Tang WH, DiDonato JA, Luscis AJ, Hazen  
964 SL. 2011. Gut flora metabolism of phosphatidylcholine promotes cardiovascular disease. *Nature*  
965 472:57-63.
- 966 102. Schicho R, Marsche G, Storr M. 2015. Cardiovascular complications in inflammatory bowel  
967 disease. *Curr Drug Targets* 16:181-8.
- 968 103. Andersen NN, Jess T. 2014. Risk of cardiovascular disease in inflammatory bowel disease.  
969 *World J Gastrointest Pathophysiol* 5:359-65.
- 970 104. Gootenberg DB, Paer JM, Luevano JM, Kwon DS. 2017. HIV-associated changes in the enteric  
971 microbial community: potential role in loss of homeostasis and development of systemic  
972 inflammation. *Curr Opin Infect Dis* 30:31-43.
- 973 105. Troseid M, Manner IW, Pedersen KK, Haissman JM, Kvale D, Nielsen SD. 2014. Microbial  
974 translocation and cardiometabolic risk factors in HIV infection. *AIDS Res Hum Retroviruses*  
975 30:514-22.
- 976 106. Nobles CL, Maresso AW. 2011. The theft of host heme by Gram-positive pathogenic bacteria.  
977 *Metallomics* 3:788-96.
- 978 107. Anzaldi LL, Skaar EP. 2010. Overcoming the heme paradox: heme toxicity and tolerance in  
979 bacterial pathogens. *Infect Immun* 78:4977-89.
- 980 108. Gasche C, Lomer MC, Cavill I, Weiss G. 2004. Iron, anaemia, and inflammatory bowel  
981 diseases. *Gut* 53:1190-7.
- 982 109. Kaitha S, Bashir M, Ali T. 2015. Iron deficiency anemia in inflammatory bowel disease. *World J*  
983 *Gastrointest Pathophysiol* 6:62-72.
- 984 110. Williams HR, Cox IJ, Walker DG, North BV, Patel VM, Marshall SE, Jewell DP, Ghosh S,  
985 Thomas HJ, Teare JP, Jakobovits S, Zeki S, Welsh KI, Taylor-Robinson SD, Orchard TR. 2009.  
986 Characterization of inflammatory bowel disease with urinary metabolic profiling. *Am J*  
987 *Gastroenterol* 104:1435-44.

- 988 111. Williams HR, Cox IJ, Walker DG, Cobbold JF, Taylor-Robinson SD, Marshall SE, Orchard TR.  
989 2010. Differences in gut microbial metabolism are responsible for reduced hippurate synthesis  
990 in Crohn's disease. *BMC Gastroenterol* 10:108.
- 991 112. Radogna F, Diederich M, Ghibelli L. 2010. Melatonin: a pleiotropic molecule regulating  
992 inflammation. *Biochem Pharmacol* 80:1844-52.
- 993 113. Paulose JK, Wright JM, Patel AG, Cassone VM. 2016. Human Gut Bacteria Are Sensitive to  
994 Melatonin and Express Endogenous Circadian Rhythmicity. *PLoS One* 11:e0146643.
- 995 114. Paiva CN, Bozza MT. 2014. Are reactive oxygen species always detrimental to pathogens?  
996 *Antioxid Redox Signal* 20:1000-37.
- 997 115. Morgan XC, Tickle TL, Sokol H, Gevers D, Devaney KL, Ward DV, Reyes JA, Shah SA, LeLeiko  
998 N, Snapper SB, Bousvaros A, Korzenik J, Sands BE, Xavier RJ, Huttenhower C. 2012.  
999 Dysfunction of the intestinal microbiome in inflammatory bowel disease and treatment. *Genome  
1000 biology* 13:R79.
- 1001 116. Preston A, Mandrell RE, Gibson BW, Apicella MA. 1996. The lipooligosaccharides of pathogenic  
1002 gram-negative bacteria. *Crit Rev Microbiol* 22:139-80.
- 1003 117. Cardenas L, Dominguez J, Santana O, Quinto C. 1996. The role of the nodI and nodJ genes in  
1004 the transport of Nod metabolites in *Rhizobium etli*. *Gene* 173:183-7.
- 1005 118. Vazquez M, Santana O, Quinto C. 1993. The NodL and NodJ proteins from *Rhizobium* and  
1006 *Bradyrhizobium* strains are similar to capsular polysaccharide secretion proteins from gram-  
1007 negative bacteria. *Mol Microbiol* 8:369-77.
- 1008 119. Funderburg NT, Stubblefield Park SR, Sung HC, Hardy G, Clagett B, Ignatz-Hoover J, Harding  
1009 CV, Fu P, Katz JA, Lederman MM, Levine AD. 2013. Circulating CD4(+) and CD8(+) T cells are  
1010 activated in inflammatory bowel disease and are associated with plasma markers of  
1011 inflammation. *Immunology* 140:87-97.
- 1012 120. Integrative HMPRNC. 2014. The Integrative Human Microbiome Project: dynamic analysis of  
1013 microbiome-host omics profiles during periods of human health and disease. *Cell Host Microbe*  
1014 16:276-89.
- 1015 121. Human Microbiome Project C. 2012. Structure, function and diversity of the healthy human  
1016 microbiome. *Nature* 486:207-14.
- 1017 122. Sharpton TJ. 2017. A high-throughput and modular workflow to quality control shotgun  
1018 metagenomic DNA sequence libraries, <https://zenodo.org/record/834783> -  
1019 [.WYNwP9MrLAW](https://doi.org/10.5281/zenodo.834783).
- 1020 123. Schmieder R, Edwards R. 2011. Quality control and preprocessing of metagenomic datasets.  
1021 *Bioinformatics* 27:863-4.
- 1022 124. Rotmistrovsky K, Agarwala R. 2011. BMTagger: Best Match Tagger for removing human reads  
1023 from metagenomics datasets. doi:citeulike-article-id:9207261.
- 1024 125. Hyatt D, Chen GL, Locascio PF, Land ML, Larimer FW, Hauser LJ. 2010. Prodigal: prokaryotic  
1025 gene recognition and translation initiation site identification. *BMC Bioinformatics* 11:119.
- 1026 126. Zhao Y, Tang H, Ye Y. 2012. RAPSearch2: a fast and memory-efficient protein similarity search  
1027 tool for next-generation sequencing data. *Bioinformatics* 28:125-6.
- 1028 127. Nayfach S, Pollard KS. 2015. Average genome size estimation improves comparative  
1029 metagenomics and sheds light on the functional ecology of the human microbiome. *Genome  
1030 Biol* 16:51.
- 1031 128. Roberts DW. 2016. labdsv: Ordination and Multivariate Analysis for Ecology, [https://cran.r-  
1032 project.org/web/packages/labdsv/](https://cran.r-project.org/web/packages/labdsv/).
- 1033 129. Jari Oksanen FGB, Michael Friendly, Roeland Kindt, Pierre Legendre, Dan McGlenn, Peter R.  
1034 Minchin, R. B. O'Hara, Gavin L. Simpson, Peter Solymos, M. Henry H. Stevens, Eduard Szoecs,  
1035 Helene Wagner. 2017. vegan: Community Ecology Package, [https://cran.r-  
1036 project.org/web/packages/vegan/](https://cran.r-project.org/web/packages/vegan/).
- 1037 130. Chen J, Bittinger K, Charlson ES, Hoffmann C, Lewis J, Wu GD, Collman RG, Bushman FD, Li  
1038 H. 2012. Associating microbiome composition with environmental covariates using generalized  
1039 UniFrac distances. *Bioinformatics* 28:2106-13.

- 1040 131. Yarza P, Ludwig W, Euzéby J, Amann R, Schleifer KH, Glockner FO, Rossello-Mora R. 2010.  
1041 Update of the All-Species Living Tree Project based on 16S and 23S rRNA sequence analyses.  
1042 *Syst Appl Microbiol* 33:291-9.
- 1043 132. Zhang Y. 2013. Likelihood-based and Bayesian methods for Tweedie compound Poisson linear  
1044 mixed models. *Statistics and Computing* 23:743-757.
- 1045 133. Ye Y, Doak TG. 2009. A parsimony approach to biological pathway reconstruction/inference for  
1046 genomes and metagenomes. *PLoS Comput Biol* 5:e1000465.
- 1047 134. Hejblum BP, Skinner J, Thiebaut R. 2015. Time-Course Gene Set Analysis for Longitudinal  
1048 Gene Expression Data. *PLoS Comput Biol* 11:e1004310.
- 1049 135. Wu S, Wu H. 2013. More powerful significant testing for time course gene expression data using  
1050 functional principal component analysis approaches. *BMC Bioinformatics* 14:6.
- 1051 136. Lenth RV. 2016. Least-Squares Means: The R Package lsmeans. *J Stat Softw* 69:33.
- 1052

1053

1054 **Supplemental Files**

1055 **Additional File 1: Figure S1.** Longitudinal phenotypic monitoring of T cell activation in PBMC of WT  
1056 and DNR “bleeder” mice. Representative FACS plots from WT bleeder #89 and DNR bleeder #85 at  
1057 indicated time points. The gate is set on CD44<sup>hi</sup> population to show the percent of activated effector and  
1058 memory T cells over time.

1059

1060 **Additional File 2: Figure S2.** Phenotypic monitoring of CD8 T cell activation in WT and DNR “pooper”  
1061 mice post disease onset. Representative FACS plots from spleen or mesenteric lymph node (MLN)  
1062 isolated from WT pooper #90 and DNR pooper #83 at week 15. Fraction of activated (CD44<sup>hi</sup>) and  
1063 effector (CD44<sup>hi</sup> KLRG-1<sup>hi</sup>) CD8+ T cells are shown.

1064

1065 **Additional File 3: Table S1.** Project metadata

1066

1067 **Additional File 4: Figure S3.** The functional alpha-diversity of the gut microbiome as measured by  
1068 Shannon entropy differentially varies over time across cohorts (left). In fact, there is significantly greater  
1069 variation in the Shannon entropy between lines before and after disease onset (right).

1070

1071 **Additional File 5: Text S1.** Modeling methods

1072

1073 **Additional File 6: Table S2.** KEGG modules that exhibit significant group by time interaction  
1074 coefficients, indicating that they differentially diversify over time between the two lines.

1075

1076 **Additional File 7: Table S3** - KEGG Modules with significant interactions in the segmented GLMM  
1077 analysis

1078

1079 **Additional File 8: Figure S4** - Two different analyses potentially explain the taxonomic origins of the  
1080 lipooligosaccharide transport KOs that were observed. (a) Species identities of KEGG ortholog

1081 sequences that recruited reads when generating the relevant KO abundances. (b) Distance covariance  
1082 values trajectories of K09694 and K09694 and all species, with asterisks marking those dCov values  
1083 that were significantly non-zero after B-H multiple testing correction.

1084

1085 **Additional File 9: Table S4** – KEGG modules with significant intercepts, indicating that they exhibited  
1086 significantly different abundances between lines at the initial time point.

1087

1088 **Additional File 10: Figure S5** - Distributions of F-statistics computed by the DISCO method for  
1089 KO and species vectors within module and genus groupings respectively, compared to values from  
1090 permuted groupings. Kolmogorov-Smirnov tests show significant difference between real and permuted  
1091 distributions in the functional groupings, but no significant difference in the taxonomic groupings.

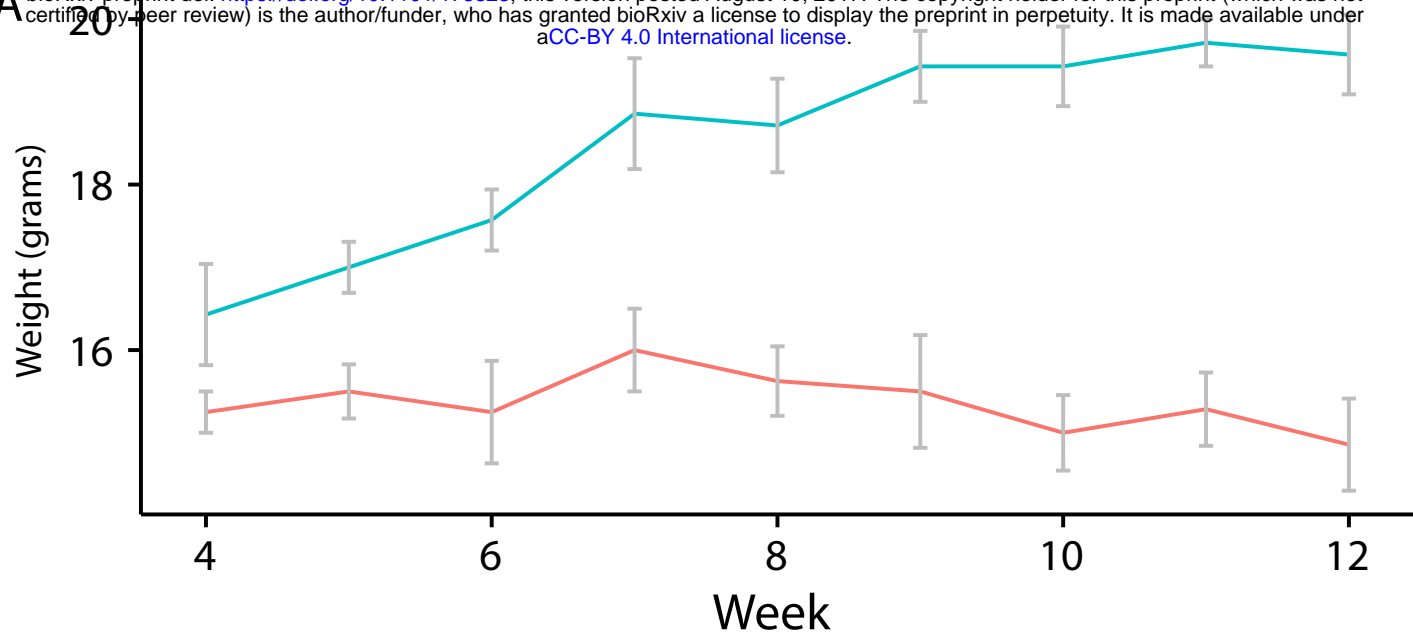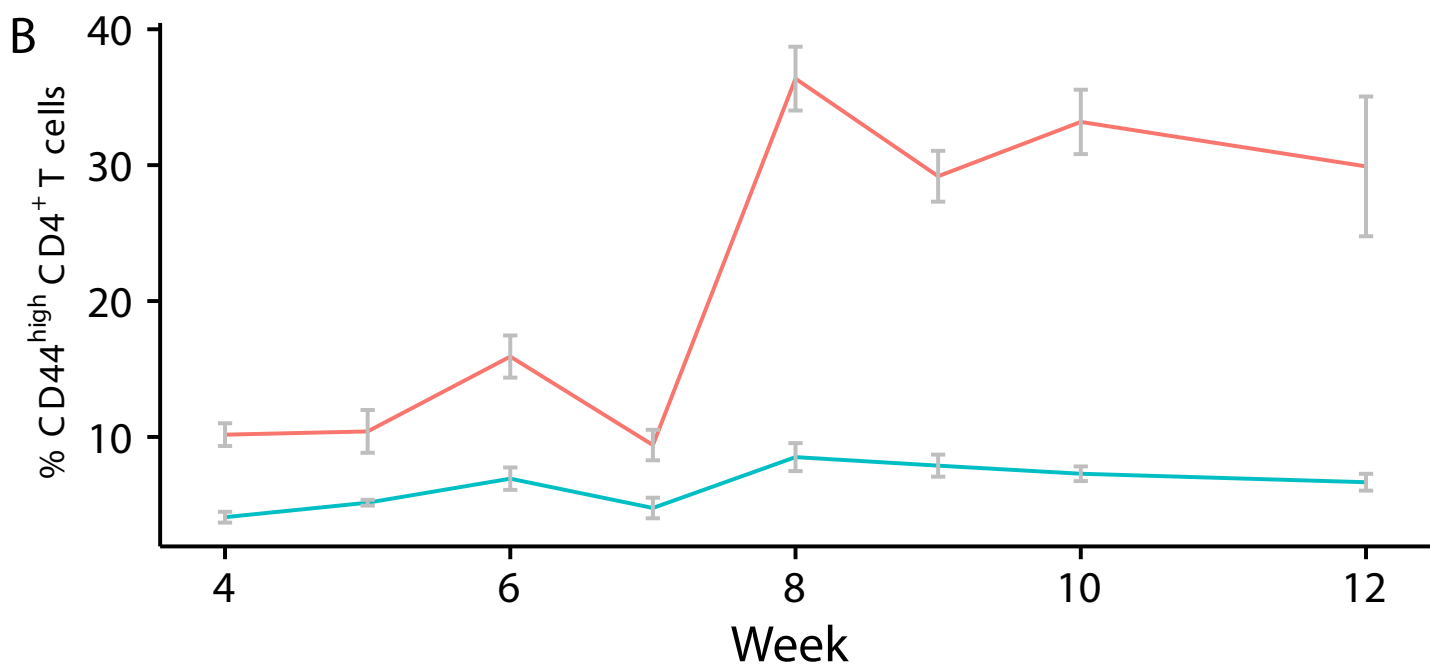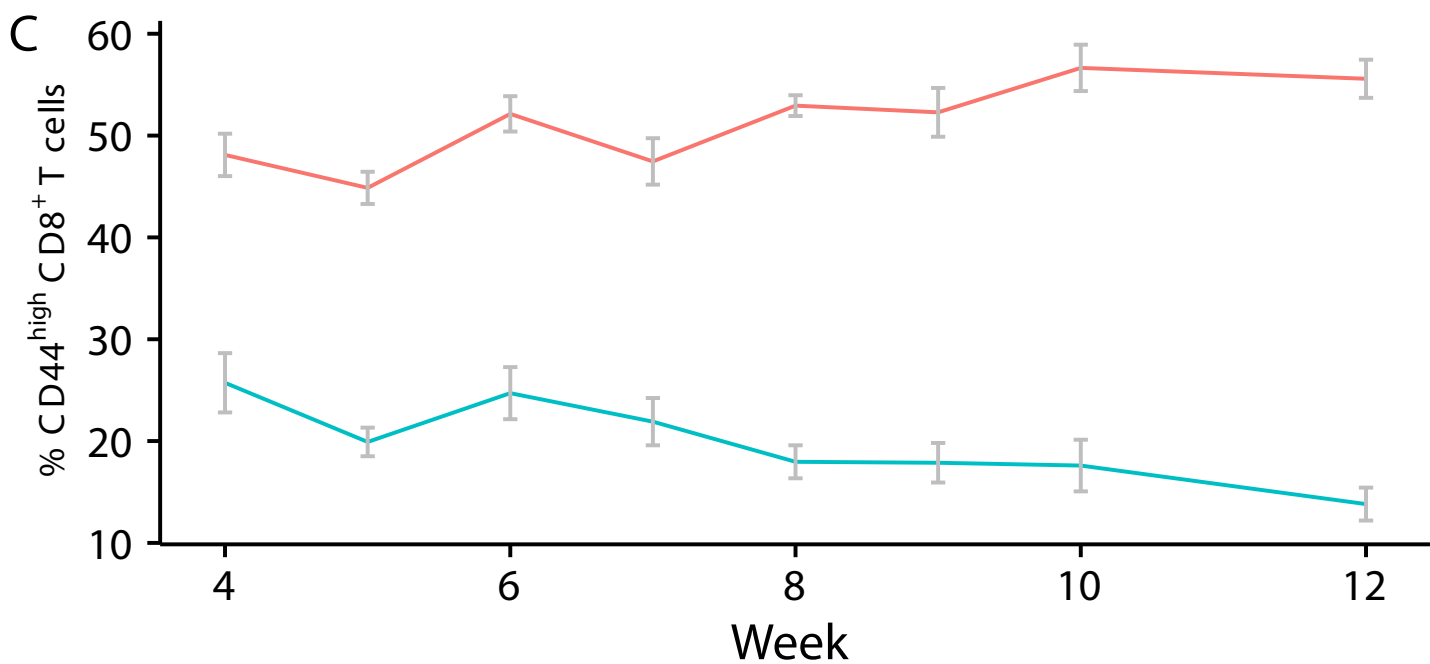

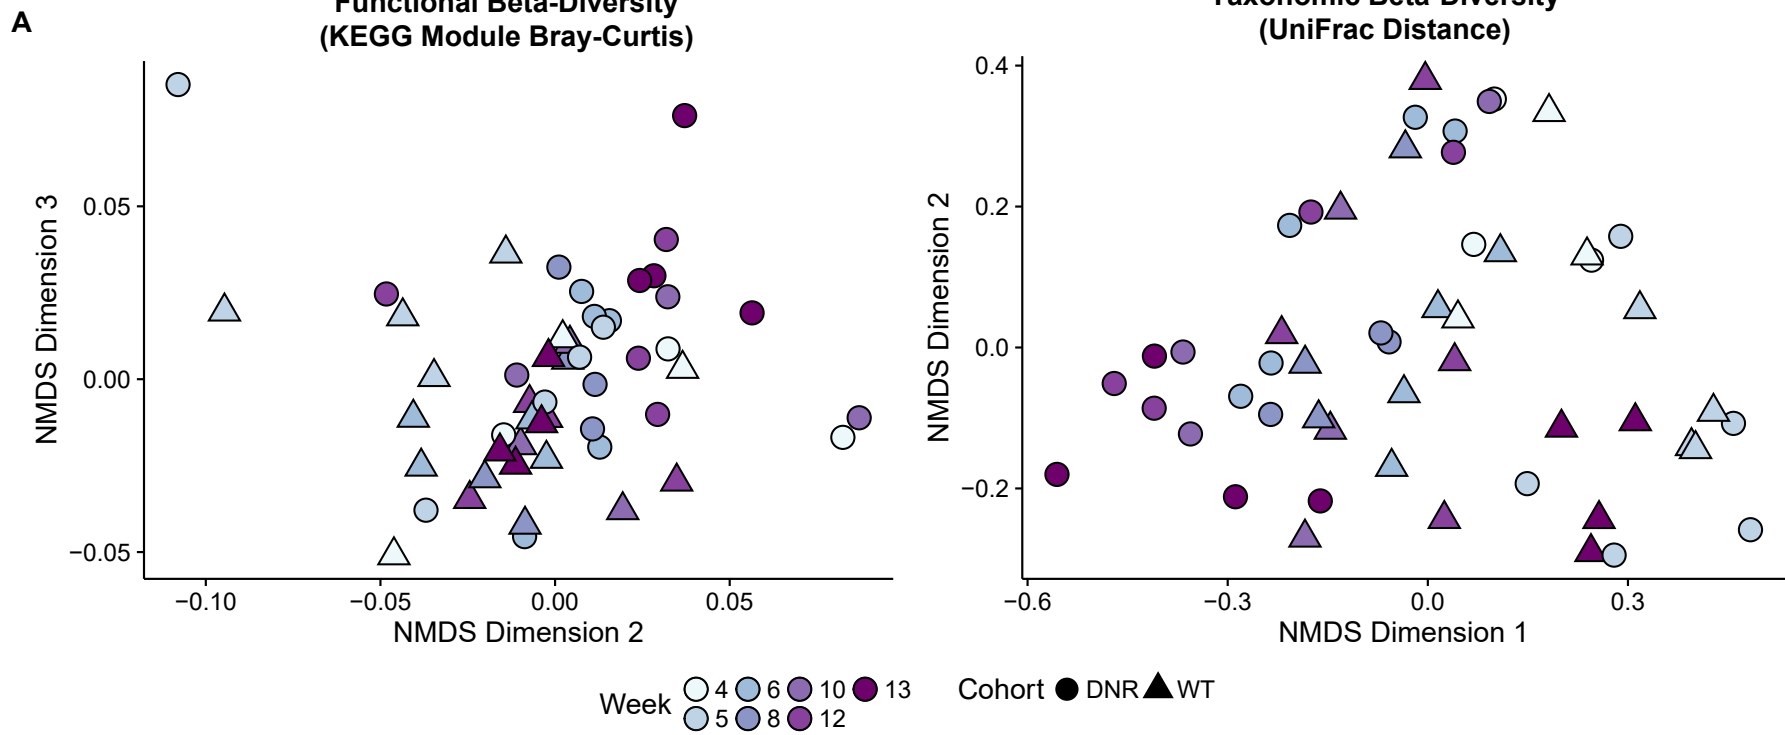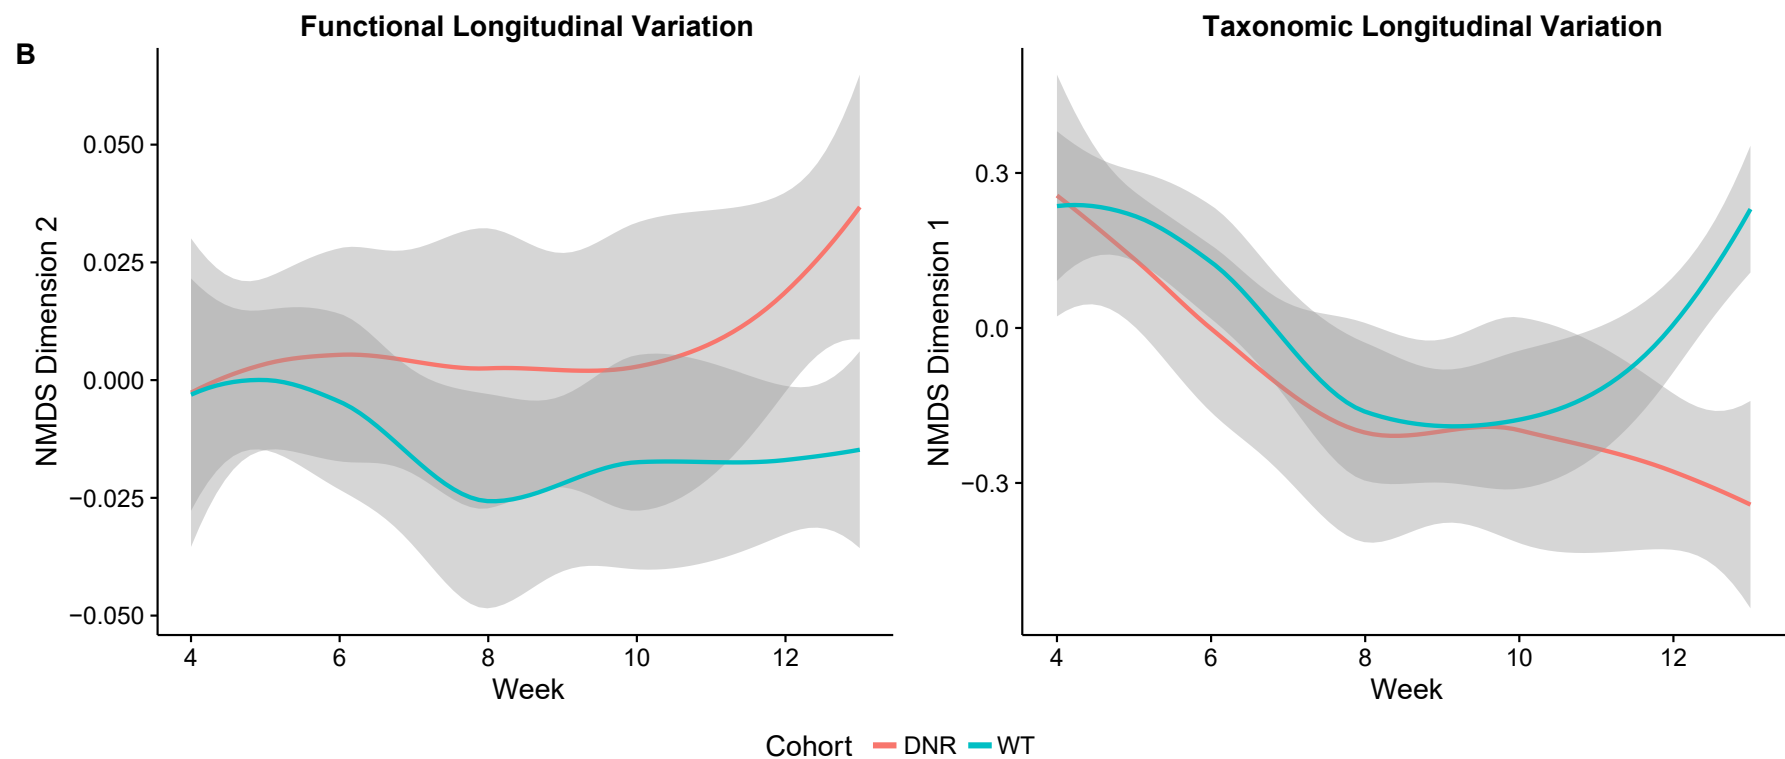

**A**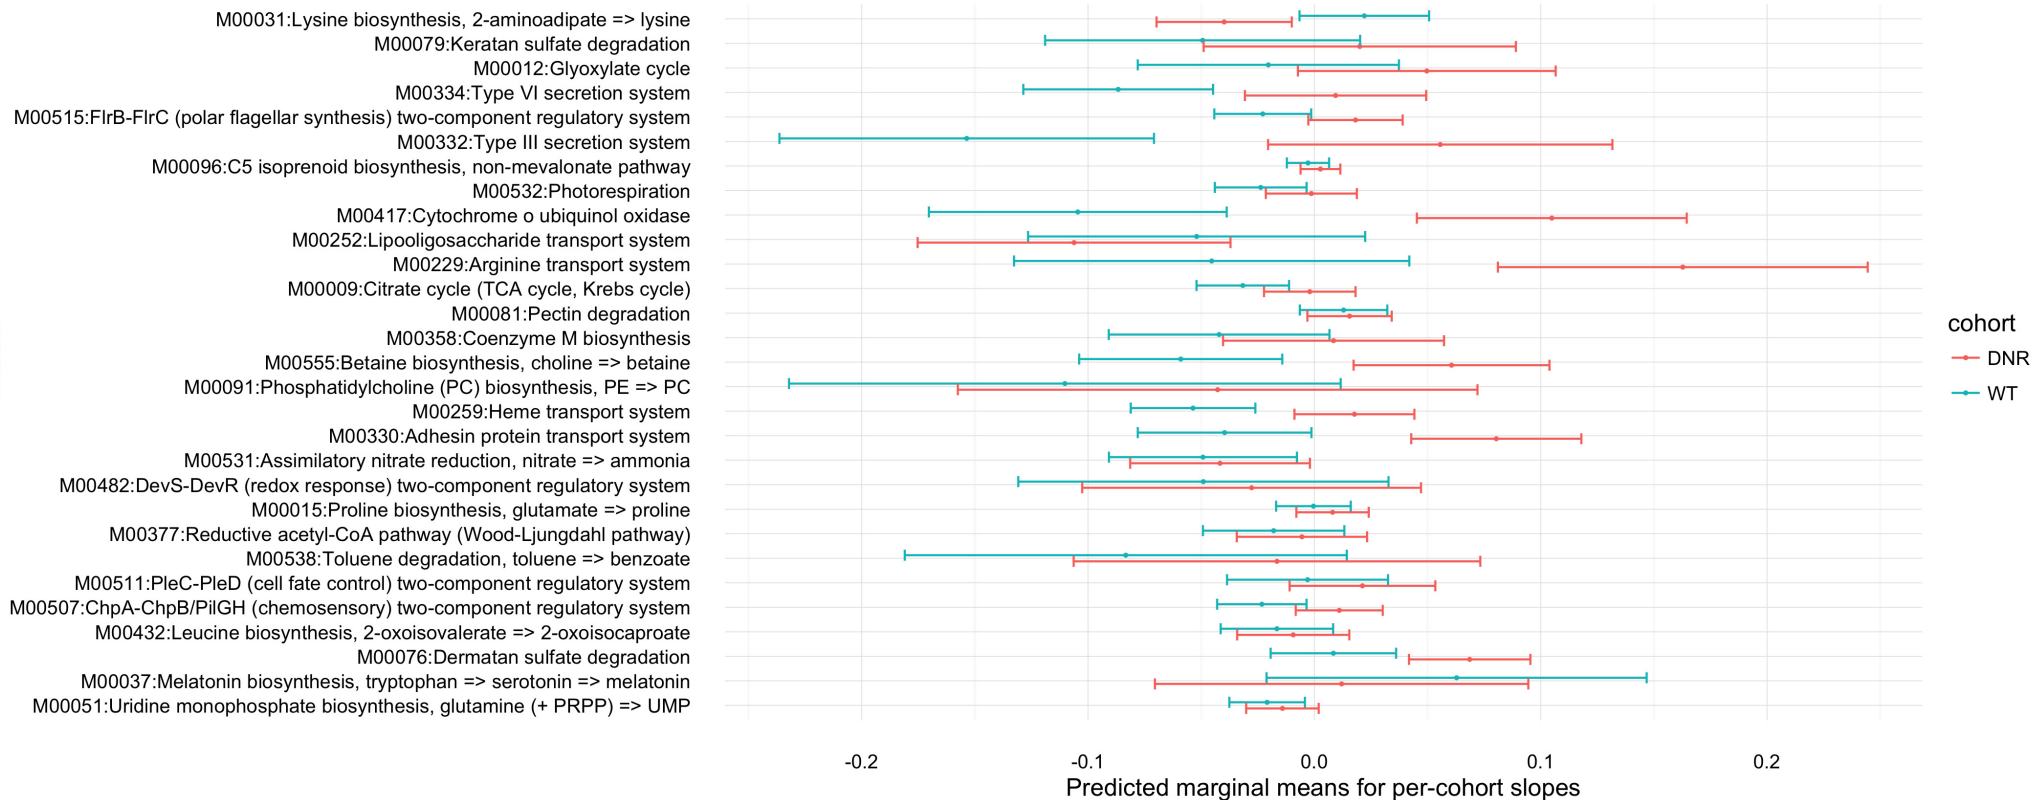**B**

### Abundance trajectories of M00031 (Lysine biosynthesis)

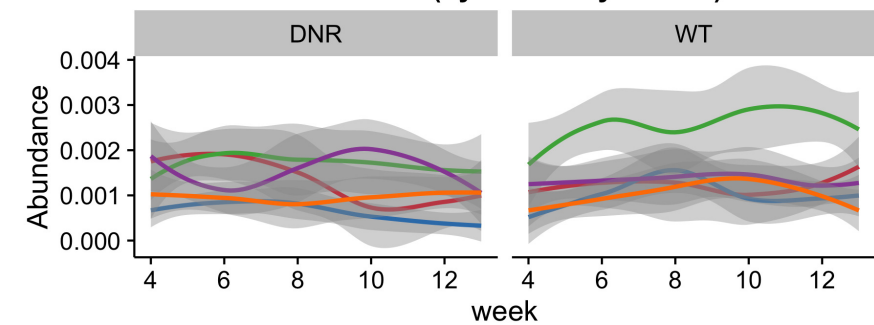**C**

### Abundance trajectories of M00330 (Adhesin transport)

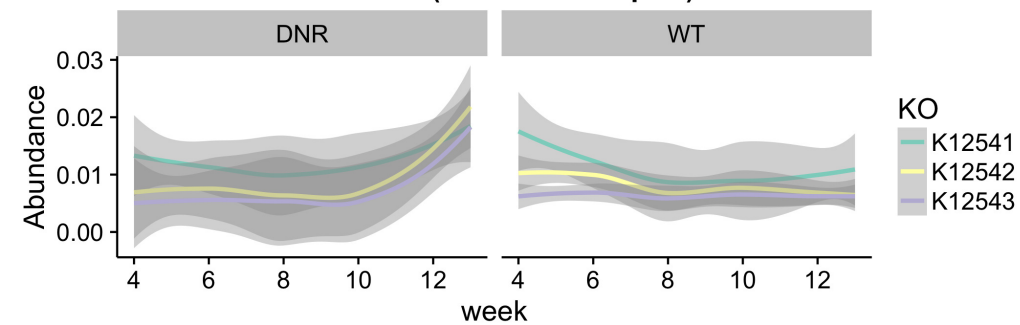



## Results of segmented GLMM

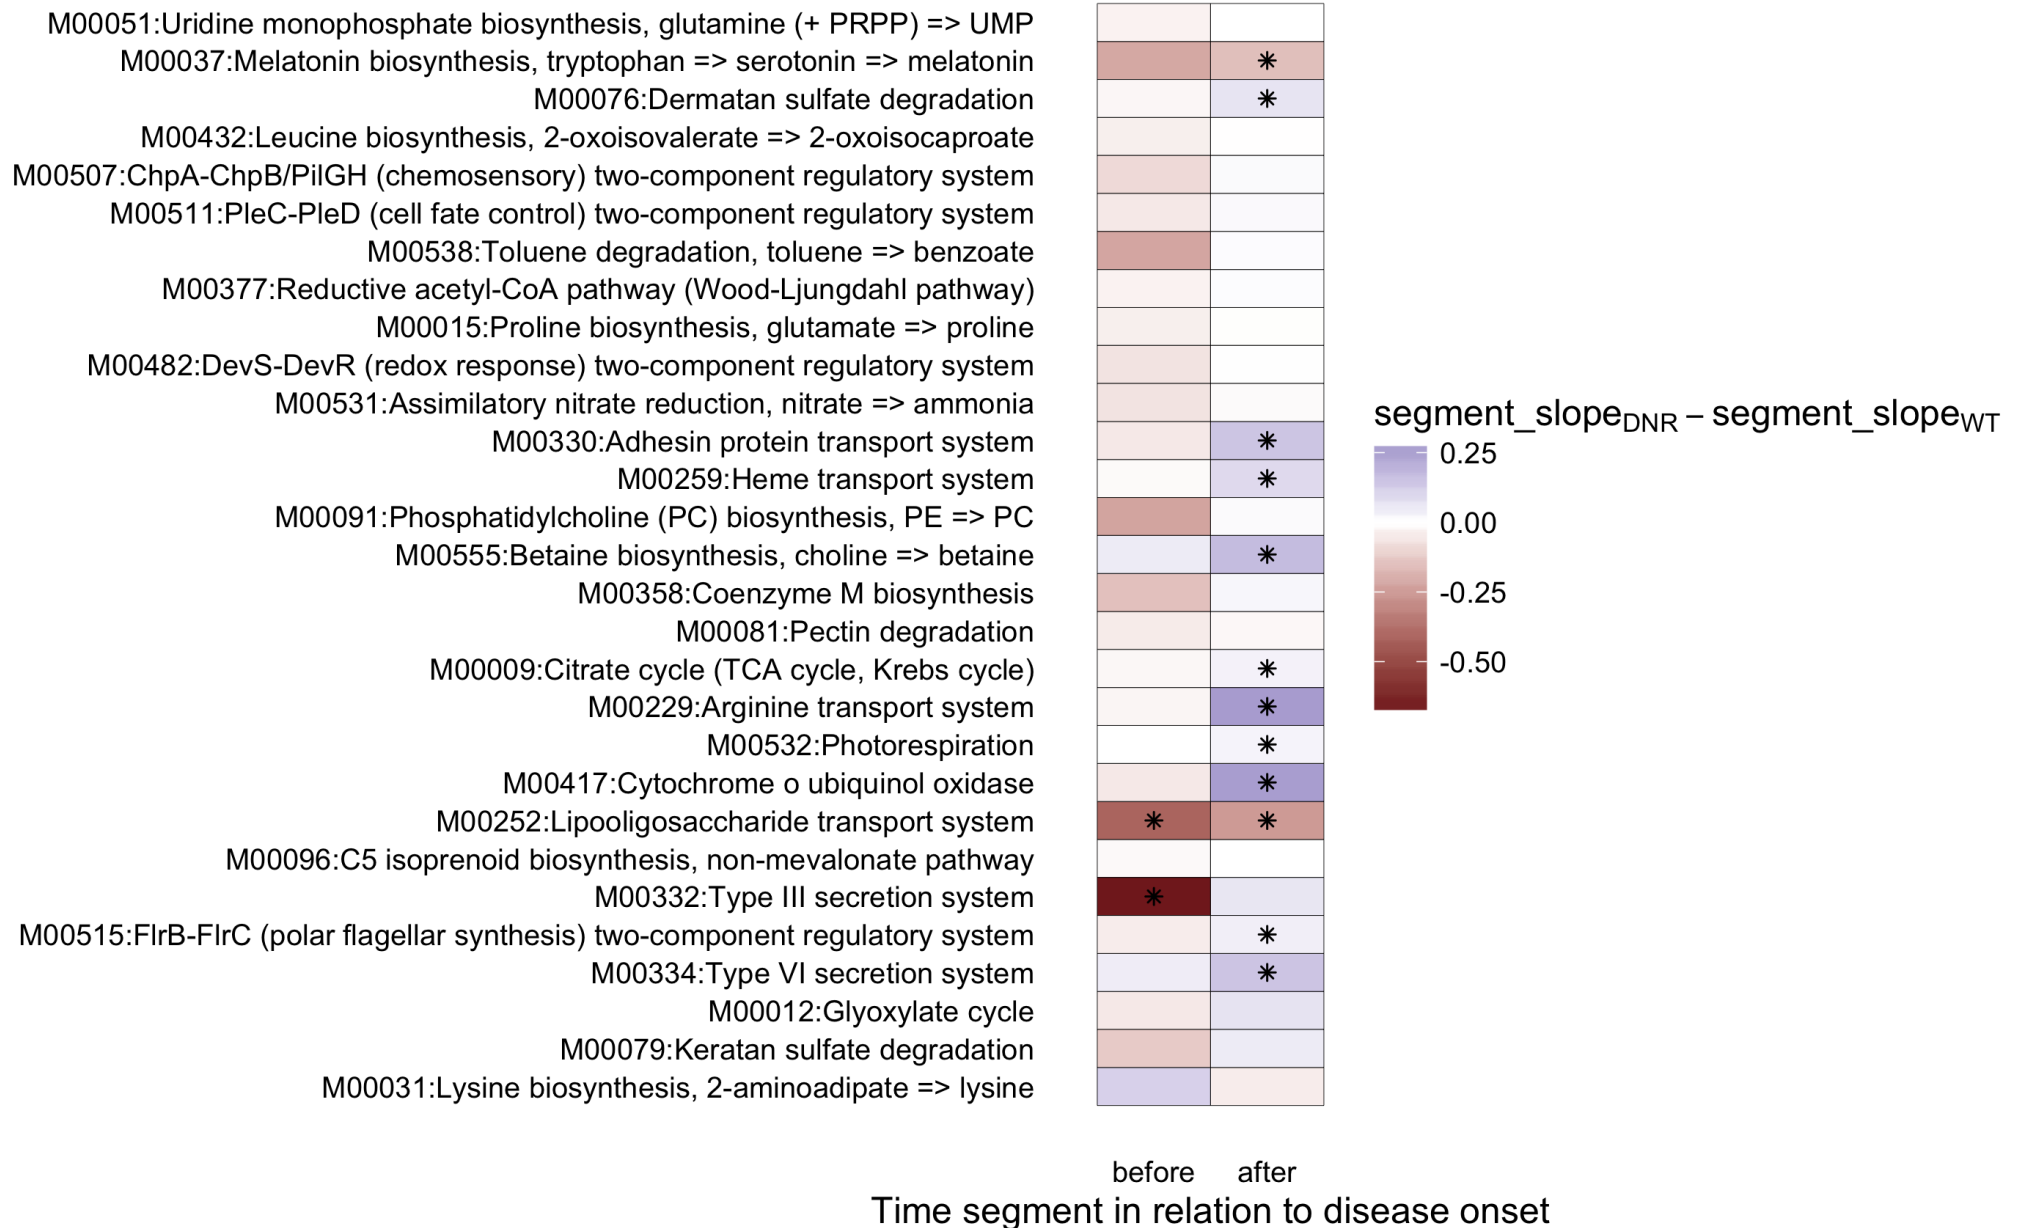

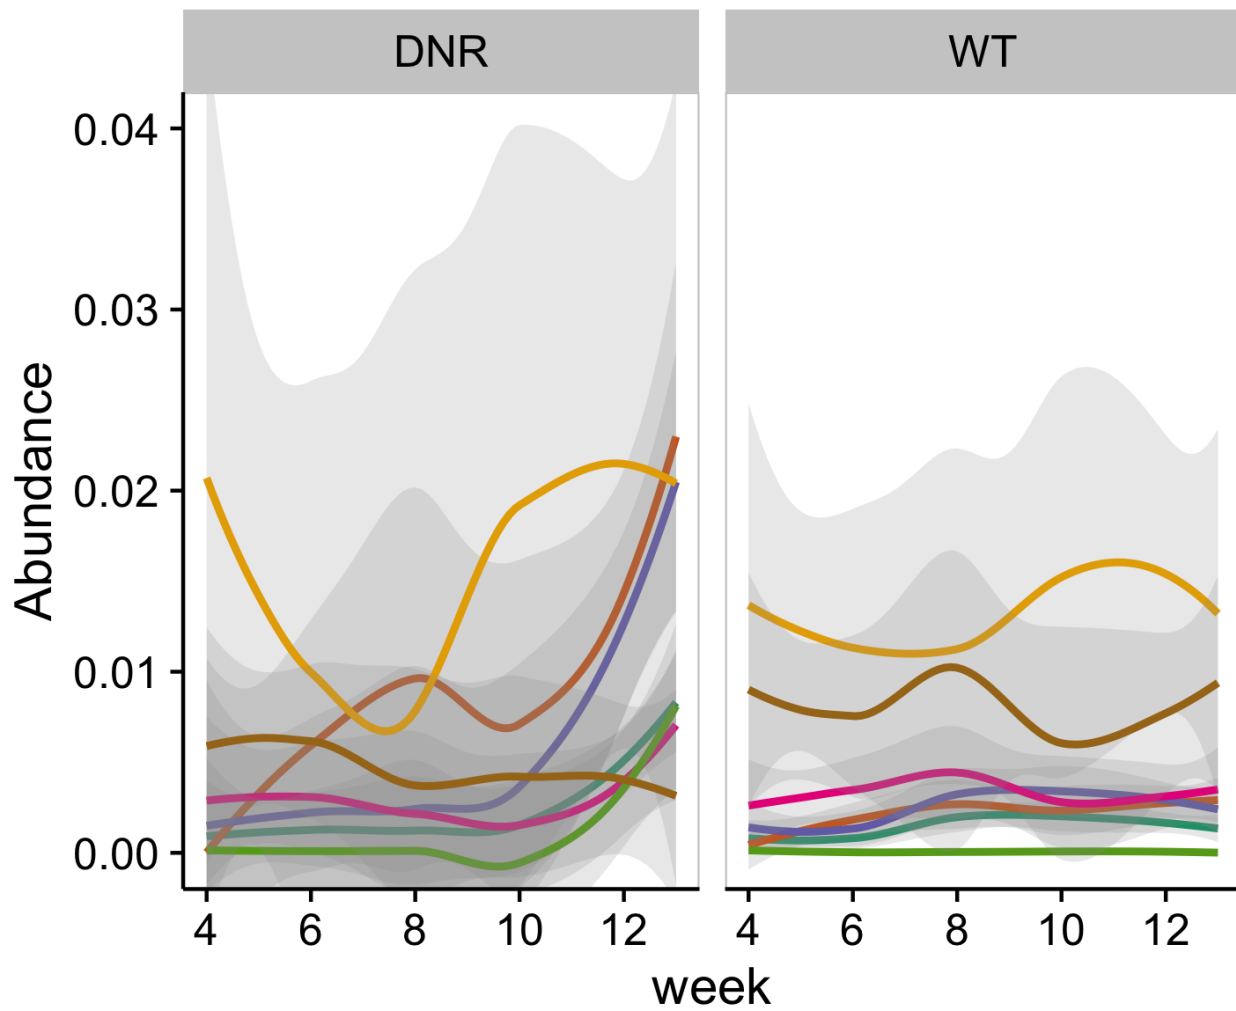

### Species

- Bacteroides rodentium
- Bacteroides sartorii
- Bacteroides uniformis
- Bacteroides xylanisolvens
- Escherichia coli O157:H43 str. T22
- Lachnospiraceae bacterium A4
- Lachnospiraceae bacterium COE1

| <b>Species ID</b> | <b>p-value</b> | <b>q-value</b> | <b>Species Name</b>                                 | <b>WT area under LOESS curve</b> | <b>DNR area under LOESS curve</b> |
|-------------------|----------------|----------------|-----------------------------------------------------|----------------------------------|-----------------------------------|
| 54642             | 0              | 0              | <i>Bacteroides sartorii</i>                         | 0.01992                          | 0.07699                           |
| 57185             | 0              | 0              | <i>Bacteroides xylanisolvens</i>                    | 0.03051                          | 0.02506                           |
| 57318             | 0              | 0              | <i>Bacteroides uniformis</i>                        | 0.02297                          | 0.04506                           |
| 58110             | 0              | 0              | <i>Escherichia coli</i><br><i>O157:H43 str. T22</i> | 5.35E-04                         | 0.007523                          |
| 59684             | 0.0001         | 0.0025         | <i>Lachnospiraceae</i><br><i>bacterium COE1</i>     | 0.07203                          | 0.04213                           |
| 59708             | 0              | 0              | <i>Bacteroides rodentium</i>                        | 0.0136                           | 0.01986                           |
| 61442             | 0.0013         | 0.02786        | <i>Lachnospiraceae</i><br><i>bacterium A4</i>       | 0.119                            | 0.1348                            |
